## Differential contributions of AF-1 and AF-2 activities to the developmental functions of RXR $\alpha$

Bénédicte Mascrez, Manuel Mark, Wojciech Krezel, Valérie Dupé, Marianne LeMeur, Norbert B. Ghyselinck and Pierre Chambon\*

Institut de Génétique et de Biologie Moléculaire et Cellulaire, CNRS-INSERM-ULP-Collège de France, BP163, 67404 Illkirch Cedex, C.U. de Strasbourg, France

\*Author for correspondence (e-mail: chambon@igbmc.u-strasbg.fr)

Accepted 8 March 2001

### SUMMARY

We have engineered a mouse mutation that specifically deletes most of the RXR $\alpha$  N-terminal A/B region, which includes the activation function AF-1 and several phosphorylation sites. The homozygous mutants (RXR $\alpha$ af1<sup>o</sup>), as well as compound mutants that further lack RXR $\beta$  and RXR $\gamma$ , are viable and display a subset of the abnormalities previously described in RXR $\alpha$ -null mutants. In contrast, RXR $\alpha$ af1<sup>o</sup>/RAR<sup>-/-</sup> ( $\alpha$ ,  $\beta$  or  $\gamma$ ) compound mutants die in utero and exhibit a large array of malformations that nearly recapitulate the full spectrum of the defects that characterize the fetal vitamin A-deficiency (VAD) syndrome. Altogether, these observations indicate that the RXR $\alpha$  AF-1 region A/B is functionally important, although less so than the ligand-dependent

activation function AF-2, for efficiently transducing the retinoid signal through RAR/RXR $\alpha$  heterodimers during embryonic development. Moreover, it has a unique role in retinoic acid-dependent involution of the interdigital mesenchyme. During early placentogenesis, both the AF-1 and AF-2 activities of RXR $\alpha$ ,  $\beta$  and  $\gamma$  appear to be dispensable, suggesting that RXRs act as silent heterodimeric partners in this process. However, AF-2 of RXR $\alpha$ , but not AF-1, is required for differentiation of labyrinthine trophoblast cells, a late step in the formation of the placental barrier.

Key words: Nuclear receptor, Retinoic acid, Gene knockout, Transcriptional activity, Activation function, Placenta, Limb, Mouse

### INTRODUCTION

Retinoids (vitamin A derivatives) are crucial for many aspects of vertebrate physiology and homeostasis (reviewed in Sporn et al., 1994). They also play essential roles in morphogenesis and organogenesis, as inferred from the large spectrum of developmental abnormalities displayed by vitamin A-deficient (VAD) fetuses (reviewed in Kastner et al., 1995; Dickman et al., 1997; White et al., 1998). Two families of nuclear receptors for retinoids, the RARs ( $\alpha$ ,  $\beta$  and  $\gamma$  isoforms and their isoforms; activated by all forms of retinoic acid, RA) and the RXRs ( $\alpha$ ,  $\beta$  and  $\gamma$  isoforms and their isoforms; activated by 9-*cis* RA only) transduce the retinoid signal. RARs and RXRs act in transfected cells in vitro as ligand-dependent transcriptional transregulators through binding as RAR/RXR heterodimers to *cis*-acting RA response elements present in cognate reporter genes (reviewed in Leid et al., 1992; Chambon, 1996; Mangelsdorf et al., 1995; Mangelsdorf and Evans, 1995). In addition, RXRs can act as heterodimerization partners with nuclear receptors other than RARs, such as thyroid hormone receptors, vitamin D3 receptor, peroxisome proliferator activated receptors and several orphan receptors (reviews: Mangelsdorf and Evans, 1995; Chambon, 1996; Perlmann and Evans, 1997). Importantly, RAR-specific and RXR-specific ligands

synergize to activate target genes or to elicit biological responses in cell systems (Taneja et al., 1996; Taneja et al., 1997; Roy et al., 1995; Chen et al., 1996; Horn et al., 1996; Nagy et al., 1995; Vivat et al., 1997), as well as in whole embryos (Minucci et al., 1996; Minucci et al., 1997; Lu et al., 1997), indicating that both partners of the RAR/RXR heterodimer can be transcriptionally active. However, the liganded RXR is not active unless its RAR partner is itself liganded (Roy et al., 1995; Apfel et al., 1995; Chambon, 1996; Taneja et al., 1996; Taneja et al., 1997; Chen et al., 1996; Vivat et al., 1997; Botling et al., 1997).

To investigate the involvement of RARs and RXRs in the transduction of retinoid signals under physiological conditions in vivo, all RAR and RXR genes, and most of their isoforms have been knocked out in the mouse (for reviews see Kastner et al., 1995; Mark et al., 1999). Altogether, these studies have led to several important conclusions concerning the role of these receptors during morphogenesis and organogenesis: (1) RARs and RXRs mediate the developmental functions of RA; (2) functional redundancies exist among the various RARs and among the various RXRs; (3) RAR/RXR $\alpha$  heterodimers are most likely the main functional units that transduce the retinoid signal during development; (4) transcriptional activation of both partners in RAR/RXR $\alpha$  heterodimers are often required to activate target genes and to mediate under

physiological conditions the retinoid effects in morphogenesis and organogenesis.

The N-terminal A/B domain of RXRs contains an autonomous ligand-independent transcriptional activation function called AF-1, whereas the C-terminal, ligand-binding domain E, contains a ligand-dependent transcriptional activation function, AF-2 (reviewed in Leid et al., 1992; Chambon, 1996; Moras and Gronemeyer, 1998). For each RXR, at least two isoforms exist, which differ in their N-terminal region (Leid et al., 1992; Fleischhauer et al., 1992; Liu and Linney, 1993; Nagata et al., 1994). As to RXR $\alpha$ , the major isoform RXR $\alpha$ 1 is widely expressed in embryos and adults, whereas RXR $\alpha$ 2 and  $\alpha$ 3 are restricted to the adult testis (Brocard et al., 1996). Furthermore, RXR $\alpha$  can be phosphorylated at several serine and threonine residues in its A/B domain (Adam-Stitah et al., 1999). The AF-2 activity crucially depends upon a conserved amphipathic  $\alpha$  helix (the AF-2 AD core; Bourguet et al., 1995; Chambon, 1996; Wurtz et al., 1996; and references therein), whose deletion in the mouse has revealed its requirement for a number of RA-dependent developmental events (Mascrez et al., 1998). However, little is known about the mechanisms through which AF-1 activates transcription or about the relevance of the A/B domain in the global activity of the receptor under physiological conditions *in vivo*. Depending on the promoter context, the AF-1 of a given RXR modulates the AF-2 activity in cultured cells (Nagpal et al., 1992; Nagpal et al., 1993; Dowhan and Muscat, 1996; Chambon, 1996; Taneja et al., 1997). Thus, the transcriptional activity of a given RXR isoform may ultimately be determined, not only by its AF-2 activity, but also by its isoform-specific A/B domain.

In order to determine the importance of RXR $\alpha$  AF-1 domain A/B during development *in vivo*, we have engineered a mouse mutant line that expresses a truncated RXR $\alpha$  protein (RXR $\alpha$  $\Delta$ A/B). The phenotypic analysis of mice carrying this mutation indicate that RXR $\alpha$  AF-1 domain A/B is important for transducing RA signals *in vivo*. In addition, we have assessed the relative contribution of RXR $\alpha$  AF-1 and AF-2 activities in embryonic development and placentation.

## MATERIALS AND METHODS

### Homologous recombination

The RXR $\alpha$  targeting vector (pB48) was designed to delete exon 2 (with the exception of its splicing acceptor site), intron 2 and 102 bp of exon 3. On the one hand, a 4.6 kb *SpeI*-*Bam*HI DNA fragment (from a P19 teratocarcinoma cell genomic library; Clifford et al., 1996), containing a *Bgl*III restriction site introduced at the beginning of exon 2 through site-directed mutagenesis, was subcloned into pEMBL19+ (Dente et al., 1983), leading to plasmid pB41. On the other hand, a 3.0 kb *Bam*HI-*Xba*I DNA fragment (from a 129/sv mouse genomic library; Kastner et al., 1994), containing a *Bgl*III site introduced in exon 3 by site-directed mutagenesis, was cloned into pB41, reconstituting then the 7.6 kb *SpeI*-*Xba*I region of the RXR $\alpha$  locus (plasmid pB42). The 4.0 kb-long DNA located between the two *Bgl*III sites of pB42 was deleted and replaced by an oligonucleotide preserving the RXR $\alpha$  open reading frame, and containing a *Nhe*I restriction site (plasmid pB45). The 3.6 kb *SpeI*-*Xba*I fragment of pB45 was then cloned into a pBluescript plasmid (Stratagene) containing a 5.7 kb *Xba*I-*Hind*III genomic fragment (from a 129/sv mouse genomic library), leading to pB46. Finally, a loxP site-flanked TK-NEO fusion cassette (Metzger et al., 1995) was introduced at the *Xba*I site located in intron 3 (leading to construct pB48).

Embryonic stem (ES) cells were transfected with *Not*I-linearized pB48, as previously described (Lufkin et al., 1991). Out of 87 G418-resistant clones, two targeted clones (HS23 and BL19) were obtained. Homologous recombination was confirmed by Southern blot analysis of *Sca*I-, *Nhe*I- and *Spe*I-digested genomic DNA hybridized with probes A, B and Neo (see Fig. 1 and data not shown). In order to delete the 'floxed' TK-NEO cassette, HS23 ES cells were transiently transfected with pSG5-Cre (Gu et al., 1993). Excision was confirmed for clone HS23.26Cre by Southern-blot analysis (Fig. 1 and data not shown). To generate the first RXR $\alpha$ *af*<sup>1</sup> mouse line, HS23.26Cre cells were injected into C57BL/6 blastocysts. To generate a second RXR $\alpha$ *af*<sup>1</sup> mouse line, BL19 cells were used. In this line, the selectable marker was successfully excised by crossing heterozygotes with transgenic mice expressing Cre early during embryogenesis (CMV-Cre; Dupé et al., 1997). The phenotypes illustrated here are from line HS23.26Cre. However, identical observations were made using line BL19.

### Western blot analysis

Nuclear extracts were prepared from whole E12.5 embryos (Andrews and Faller, 1991). Proteins (15  $\mu$ g) were separated on 10% gel by SDS-PAGE and transferred onto nitrocellulose membranes. RXR $\alpha$  and RXR $\alpha$  $\Delta$ A/B proteins were detected using the 4RX3A2 anti-RXR $\alpha$  monoclonal antibody (1/500 dilution; Rochette-Egly et al., 1994) and revealed by chemiluminescence according to the manufacturer's instructions (Amersham).

### Histology, immunohistochemistry and skeletal analyses

Embryos and fetuses were fixed in Bouin's fluid, embedded in paraffin, serially sectioned and stained with Groat's Hematoxylin and Mallory's Trichrome (Mark et al., 1993). Skeletons of E18.5 fetuses were prepared as described (Lufkin et al., 1992). Nile Blue Sulfate staining and *in situ* hybridization for detection of stromelysin-3 transcripts were described previously (Dupé et al., 1999).

**Fig. 1.** Targeted deletion of the AF-1-containing A/B region of RXR $\alpha$ . (a) Representation of the wild-type RXR $\alpha$ 1 isoform (WT RXR $\alpha$ 1) and the mutant RXR $\alpha$  (RXR $\alpha$  $\Delta$ A/B). Exons E1 to E3 are shown. The functional domains are depicted as followed: AF-1, activation function 1; AF-2 AD, activation function 2 activating domain; DBD, DNA-binding domain (region C); LBD, ligand-binding domain (region E). The RXR $\alpha$ *af*<sup>1</sup> mutation leads to the production of an RXR $\alpha$  protein truncated from amino acid 11 to 132. *Bgl*III(Bg) and *Nhe*I(N) restriction sites were introduced to allow detection of the mutant allele. E $\Delta$ [2-3] contains the first codon of exon 2 fused to the 3' part of exon 3. The deletion is represented by a black box. (b) The WT RXR $\alpha$  locus, the targeting construct and the mutated loci obtained after replacement (I), and subsequent Cre-mediated excision of the 'floxed' TK-NEO cassette (II). The star represents the mutation E $\Delta$ [2-3] described in (a). LoXP sites are represented by black arrowheads. Probes A, B and C are 0.7 kb *Sca*I-*Spe*I, 0.6 kb *Eco*RI-*Bgl*III and 0.3 kb *Bam*HI-*Spe*I fragments, respectively. The size of the restriction fragment that allow identification of WT and targeted alleles (I) and (II) by Southern blot analysis using probes A, B, C and neo are indicated below (in kilobases). N, *Nhe*I; Bg, *Bgl*III; Sc, *Sca*I; S, *Spe*I; E, *Eco*RI; H, *Hind*III; B, *Bam*HI; X, *Xba*I; Xh, *Xho*I. (c) Southern blotting of ES cell DNA digested with *Bgl*III or *Spe*I and hybridized with probe A, B and neo, as indicated. WT (+/+) and RXR $\alpha$ *af*<sup>1</sup> mutant alleles before (+/(I)) or after (*af*<sup>1</sup>/+) excision of the 'floxed' TK-NEO cassette are indicated. (d) Detection of RXR $\alpha$  $\Delta$ A/B protein. Nuclear extracts prepared from 12.5-day-old embryos WT (+/+), *af*<sup>1</sup> heterozygote (*af*<sup>1</sup>/+), *af*<sup>1</sup> homozygote (*af*<sup>1</sup>°) and RXR $\alpha$ -null mutants (-/-) (Kastner et al., 1994) were analyzed by western blotting with the anti-RXR $\alpha$  monoclonal antibody 4RX3A2, directed against a C-terminal epitope.

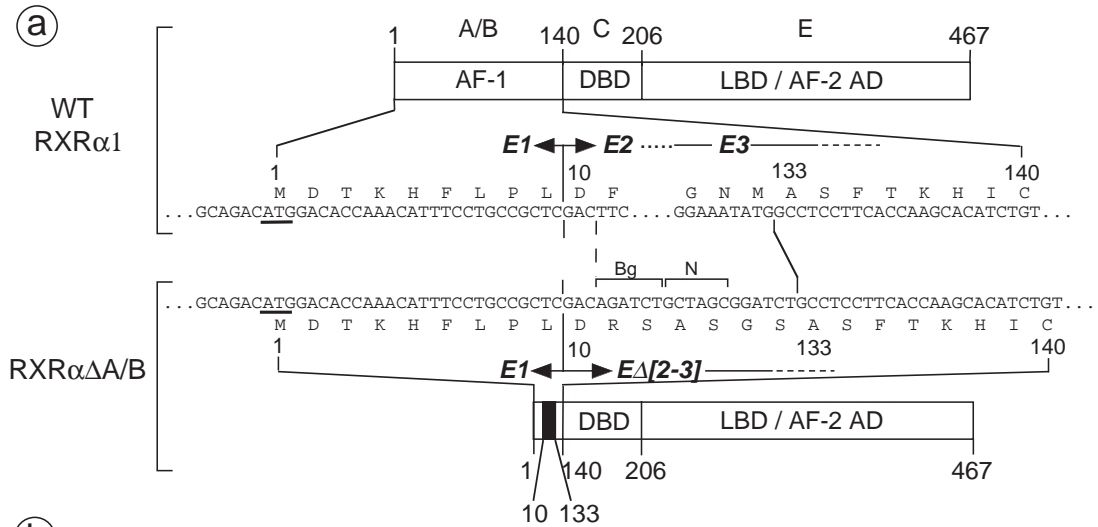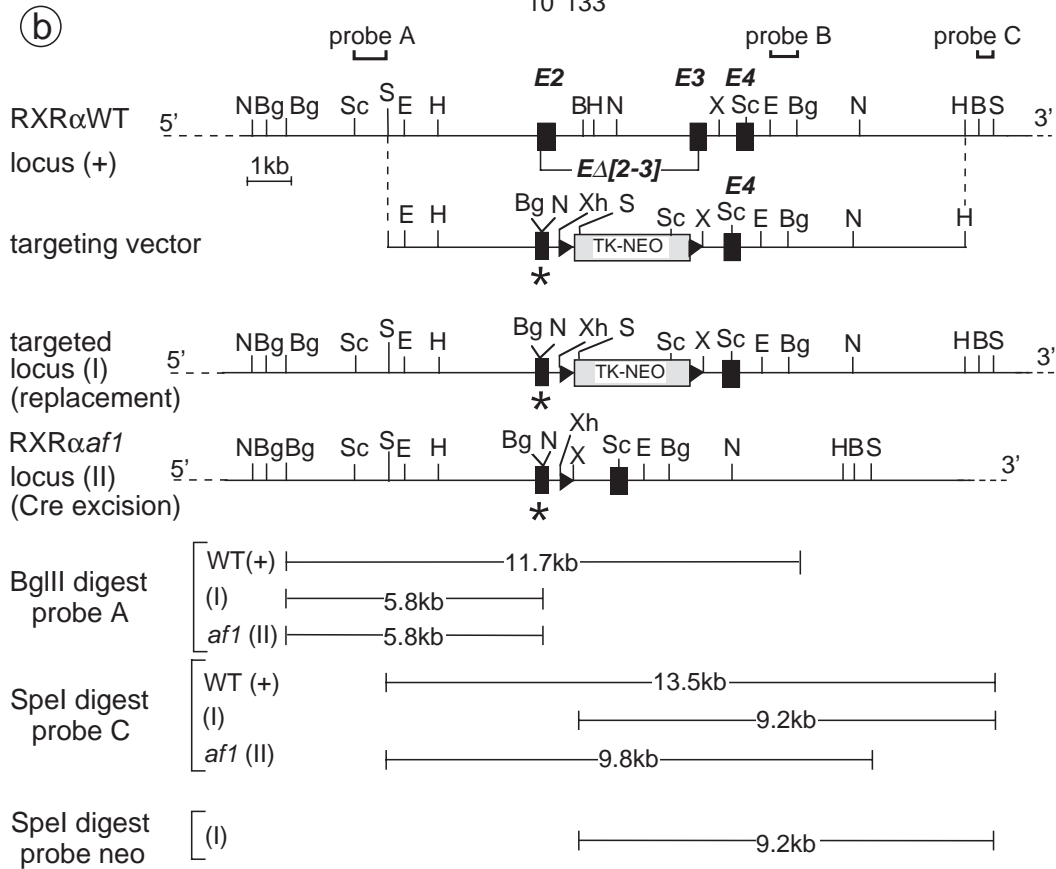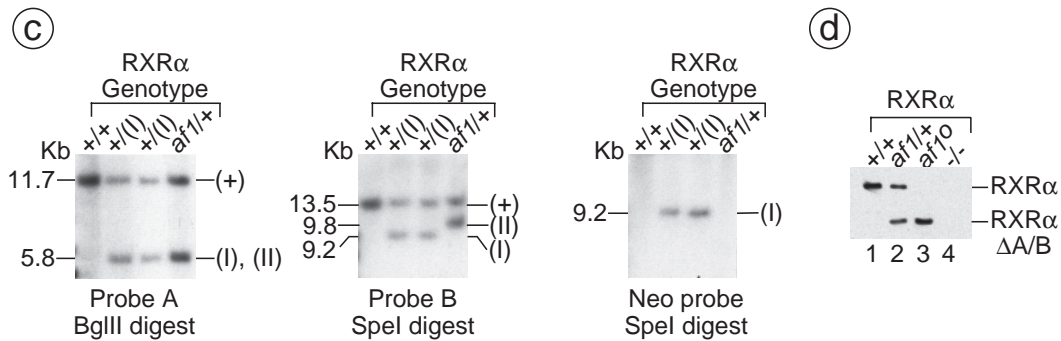

### Behavior studies

*Xαaf1<sup>o</sup>* mutant mice were in a 129/Sv/C57BL/6 (25/75%) genetic background at the time of testing. All animals were housed in cohorts of three to five mice per cage in 12 hour light/dark cycle, with freely available food and water. Behavioral testing was conducted between 14:00 and 18:00. The open field test was performed as described (Krezel et al., 1998). For the elevated plus maze, mice were placed in the central part of the maze and the percentage of time spent in the open arm, and the number of times animal stretched its head to look down were recorded for 5 minutes. To measure fine locomotor skills, the rotarod, inclined plane and cord tests were employed (Krezel et al., 1998; Wolffgramm et al., 1990; Fehlings, 1995; Perry et al., 1995). The nociception was analyzed by evaluating response to acute thermal stimuli in the tail-flick and hot-plate tests, in which the latency to remove the tail from 50°C water and the time spent on the 54° plate before licking the hindpaws were measured, respectively. Finally in taste preference, mice were presented water and 15% sucrose in different parts of the test cage. The number and the time of visits were scored for 5 minutes over 4 consecutive days, indicating preference for sucrose. For each behavioral paradigm data were analyzed by analysis of variants, ANOVA and Tukey-Kramer post hoc tests.

## RESULTS

### Targeted deletion of the RXRα AF-1 domain A/B

A targeting vector was designed to alter the RXRα locus in such a way that it encodes a mutant protein lacking amino acids 11 to 132 of RXRα1. This region contains the autonomous AF-1 activation function, several phosphorylation sites (Adam-Stitah et al., 1999), as well as the initiator codon of RXRα2 and α3 isoforms (Brocard et al., 1996). Replacement in ES cells led to a targeted allele in which most of exon 2 (with the exception of the first 3 bp), intron 2 and 102 pb of exon 3 were deleted, and in which a 'floxed' TK-NEO cassette was inserted into intron 3. Cre-mediated excision of the selection marker led to the mutant allele (hereafter designated as *RXRαaf1*), containing a single intronic loxP site (see Fig. 1b,c). Chimeric males derived from two independent ES cell clones (HS23.26Cre and BL19) transmitted the mutation through their germline, and the identity of the mutation was confirmed by sequencing RT-PCR products amplified from RNA of homozygous mutants (data not shown). In nuclear extracts prepared from whole E12.5 embryos, the truncated RXRαΔA/B protein was readily detected as a single species with an increased electrophoretic mobility, when compared with that of RXRα (Fig. 1d). Its overall level of expression in homozygous mutants was comparable with that of RXRα in wild type (WT) embryos (Fig. 1d, compare lanes 1 and 3). Moreover, the RXRαΔA/B and RXRα proteins were present in similar amounts in heterozygous embryos (Fig. 1d, lane 2). Therefore, the present mutation does not drastically alter the steady state level of the RXRα truncated protein. Consequently, its effects are likely to reflect only the lack of RXRα A/B domain.

We describe below the effects of deleting the RXRα A/B domain in mice as well as in mutants additionally null for RXRβ, RXRγ, RARα, RARβ or RARγ. To simplify nomenclature, homozygote mutant mice lacking the RXRα A/B domain are designated as *Xαaf1<sup>o</sup>*, and heterozygotes as *Xαaf1<sup>+/+</sup>*; RXRα, RXRβ, RXRγ, RARα, RARβ and RARγ homozygote null mutants are designated as Xα, Xβ, Xγ, Aα,

Aβ and Aγ, respectively; for example, *RXRαaf1<sup>o</sup>/RARα<sup>-/-</sup>* mutants are referred to as *Xαaf1<sup>o</sup>/Aα* mutants.

### *Xαaf1<sup>o</sup>* mutants are growth deficient and display congenital defects

Deletion of RXRα AF-1 domain A/B does not lead to lethal developmental defects, as viable and fertile *Xαaf1<sup>o</sup>* mutants were obtained at the expected Mendelian ratio (out of 1103 littermates born from heterozygote crosses, 27% were wild type ( $n=299$ ), 50% were heterozygote ( $n=553$ ) and 23% were homozygote ( $n=251$ )). At embryonic day 18.5 (E18.5), the weight of *Xαaf1<sup>o</sup>* mutants (1.19 g on average;  $n=20$ ) was similar to that of wild type (1.22 g on average;  $n=18$ ). In contrast, between 1 and 2 weeks of birth, *Xαaf1<sup>o</sup>* mutants were on average 20% lighter than their wild-type littermates (Fig. 2). Several of the cachectic *Xαaf1<sup>o</sup>* mutants (weight ratio < 0.5) died before weaning, whereas the others lived as long as their wild-type littermates (at least 1 year), but exhibited a weight deficit of about 10% during at least 6 months after birth (Fig. 3). This growth retardation was harmonious as (1) the ratios of adult tissue weights (liver, kidney, heart, lungs, visceral fat) to the total body weight and (2) ratios of the length of skeletal elements (femur and skull) to the total body-length did not reveal significant differences between *Xαaf1<sup>o</sup>* mutants and wild-type animals. We previously showed that *RXRα<sup>+/-</sup>* mice are growth deficient (Kastner et al., 1994). The present data further indicate that the RXRα A/B domain is important for postnatal growth.

Soft tissue syndactyly of the hindlimbs was seen unilaterally ( $n=33$ ) or bilaterally ( $n=83$ ) in 70% of the *Xαaf1<sup>o</sup>* adults. It affected mostly the base of the interdigital regions between digits 2-3 and 3-4 (data not shown). Hindlimb interdigital webbing was observed at a low frequency in *RXRα<sup>+/-</sup>* mice, but was absent in *Xαaf2<sup>o</sup>* mutants (Kastner et al., 1997a;

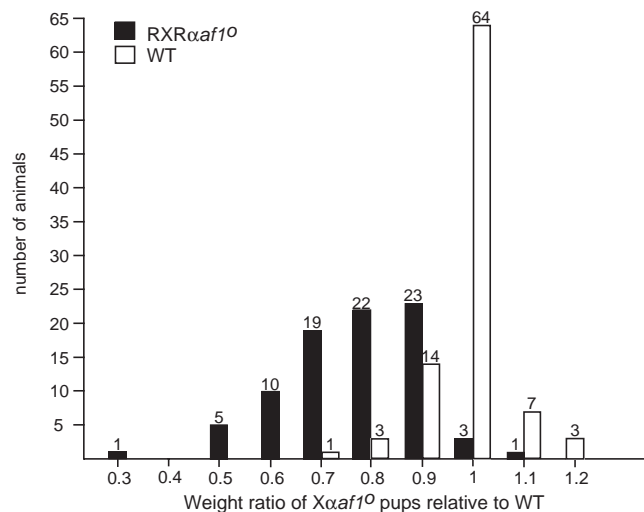

**Fig. 2.** Weight of wild type (WT) and *Xαaf1<sup>o</sup>* mutants at 1-2 weeks of age. To standardize between litters, the weight of each pup obtained from *Xαaf1<sup>+/+</sup>* intercrosses was expressed as the ratio of its weight relative to the average weight of the WT pups from the same litter. Ratios were then grouped within classes differing by 0.1 increment (y-axis). The number of *Xαaf1<sup>o</sup>* and WT animals in each class is indicated on the top of the bars.

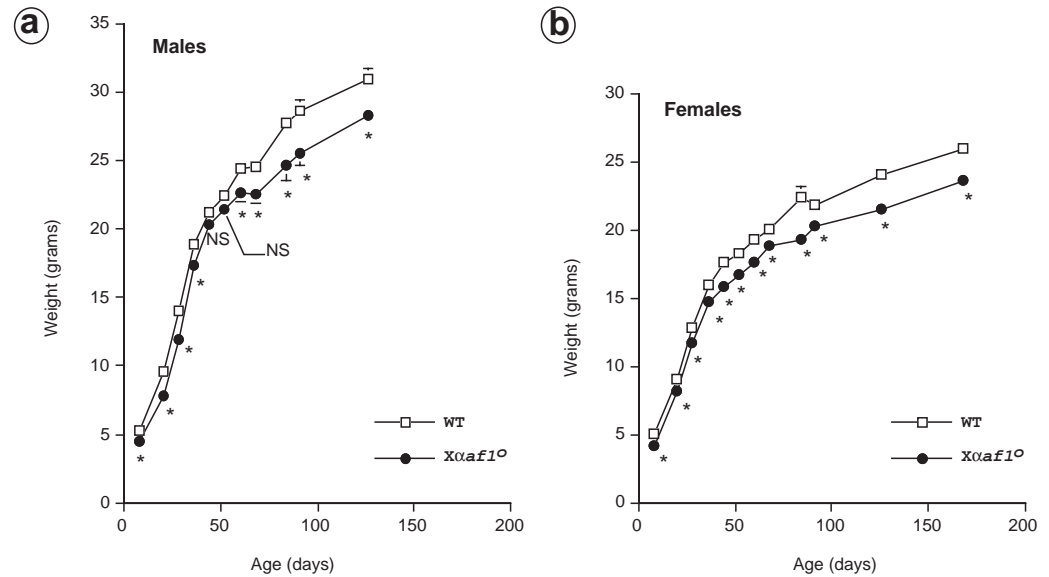

**Fig. 3.** Weight of wild-type (WT) and *Xαaf1°* mutant males (a) and females (b). Mean weights of offsprings ( $n=5$  to 18) obtained from *Xαaf1*<sup>+</sup> intercrosses are presented with s.e.m. After testing for normality and variance homogeneity, values were subjected to Student's *t* tests. Asterisks indicate the significance ( $P<0.05$ ) for the differences observed between WT and *Xαaf1°* mutants. NS, not significant.

Mascrez et al., 1998). These data indicate that RXR $\alpha$  AF-1 domain A/B is involved in the involution of the interdigital mesenchyme (see below).

A persistent hyperplastic primary vitreous body (PHPV) was the only ocular defect observed in *Xαaf1°* mutants (two out of 18). In contrast, eye morphogenesis is severely altered in *Xα* and *Xαaf2°* fetuses, which display (in addition to a completely penetrant PHPV) corneal, retinal, lens and eyelid abnormalities (Kastner et al., 1994; Kastner et al., 1997a; Mascrez et al., 1998; see Table 2). *Xα* and *Xαaf2°* fetuses also exhibit cardiac abnormalities, namely a myocardial hypoplasia and an agenesis of the conotruncal septum (Kastner et al., 1994; Kastner et al., 1997a; Sucov et al., 1994). No heart defects were detected in E18.5 *Xαaf1°* mutants analyzed by histology ( $n=3$ ). However at E9.5, electron microscopic analysis of *Xαaf1°* embryos ( $n=5$ ) revealed a single case of precocious differentiation of the cardiomyocytes as in *Xα* and *Xαaf2°* mutants (Fig. 4; Kastner et al., 1994; Kastner et al., 1997b; Mascrez et al., 1998). *Xαaf1°* mutants exhibited skeletal abnormalities similar to those found in RARs and *Xαaf2°* mutants (Lohnes et al., 1993; Ghyselinck et al., 1997; Mascrez et al., 1998): (1) homeotic transformations and malformations of cervical vertebrae; (2) bilateral agenesis of the metoptic pillar (the posterior border of the optic nerve foramen); and (3) a

misshapen cricoid cartilage (Table 1). Altogether, these results indicate that the RXR $\alpha$  AF-1 domain A/B is involved in the involution of the primary vitreous body, the differentiation of cardiomyocytes and the morphogenesis of some skeletal elements; but at first sight this domain also appears dispensable for the majority of the developmental events normally mediated by RXR $\alpha$ .

Retinoid receptors regulate brain functions (Krezel et al., 1998; Chiang et al., 1998). As RXR $\alpha$  is almost ubiquitously expressed in the central nervous system (Krezel et al., 1999), behavioral tests were performed on *Xαaf1°* mice. Sensory faculties, motor skills, locomotion activity, stereotypic behaviours, as well as stress responses, were not affected, as *Xαaf1°* mice performed as well as wild-type littermates in all these tests (see Materials and Methods for details). Thus, no obvious non-redundant function can be readily ascribed, in the central nervous system, to the RXR $\alpha$  AF-1 domain A/B.

#### Deletion of the RXR $\alpha$ AF-1 domain A/B results in additional congenital defects in the absence of RXR $\beta$ and RXR $\gamma$

As *Xαaf1°* mutants displayed neither the prenatal lethality nor all the congenital defects previously observed in *Xα* and

**Fig. 4.** Precocious differentiation of *Xαaf1°* ventricular cardiomyocytes. (a) The subepicardial myocytes of E9.5 wild-type (WT) embryos contain bundles of myofilaments, occasionally showing isolated Z lines and connected only by desmosomes. (b) In 70% of the subepicardial myocytes of this E9.5 *Xαaf1°* mutant the myofilaments are already organized into sarcomeres (S) that are connected between cells by a series of adherens junctions forming the intercalated discs (ID). D, desmosome; F, bundles of myofilaments; M, mitochondria; S, sarcomere; Z, Z line. Scale bar: 0.5  $\mu$ m.

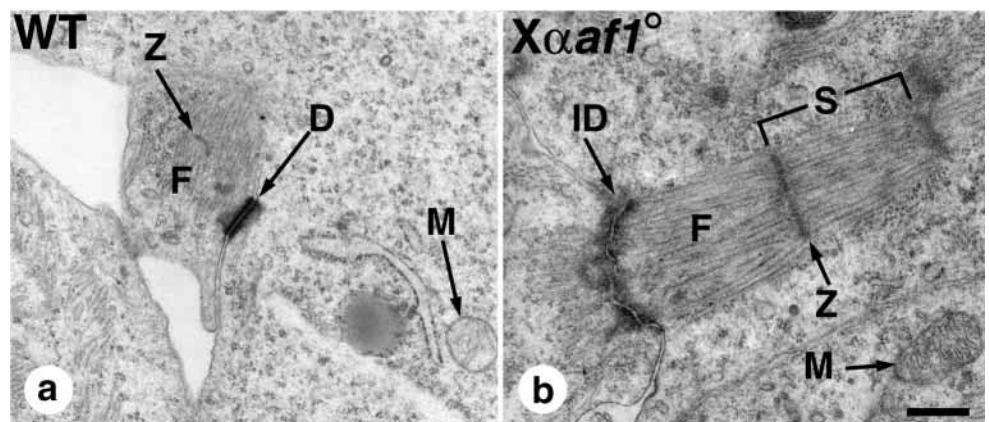

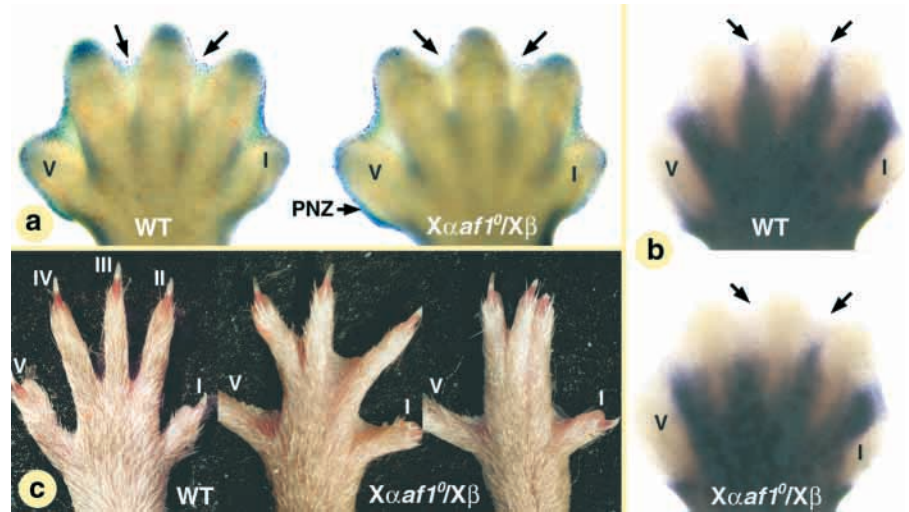

**Fig. 5.** Decreased interdigital cell death results in soft tissue syndactyly of the hindlimbs in  $X\alpha af1^{\circ}/X\beta$  mutants. Comparison of (a) cell death assessed by Nile Blue Sulfate staining, (b) expression of stromelysin-3 assessed by in situ hybridization and (c) morphology, between E14.5 (a,b) and adult (c) wild type (WT) and  $X\alpha af1^{\circ}/X\beta$  mutants. PNZ, posterior necrotic zone; I-V, digit one to five. The arrows point to the two interdigital regions, which are the most severely affected in adults.

$X\alpha af2^{\circ}$  mutants, the RXR $\alpha$  AF-1 domain A/B might be largely dispensable during development. Alternatively, RXR $\beta$  and/or RXR $\gamma$  may functionally compensate for the absence of the RXR $\alpha$  AF-1 domain A/B. To investigate this possibility, RXR $\alpha af1^{\circ}$  mutation was introduced into RXR $\beta$  and RXR $\gamma$ -null genetic backgrounds ( $X\beta/X\gamma$  mutants develop normally; Krezel et al., 1996). Steady-state levels of RXR $\alpha\Delta A/B$  in  $X\alpha af1^{\circ}/X\beta$  and  $X\alpha af1^{\circ}/X\beta/X\gamma$  E12.5 embryos were comparable with those of RXR $\alpha$  in  $X\beta$  and  $X\beta/X\gamma$  embryos, respectively (data not shown).

Of the 362 mice genotyped after birth from  $X\alpha af1^{+}/X\beta^{+/-}$  intercrosses,  $X\alpha af1^{\circ}/X\beta$  mutants were obtained at a Mendelian ratio (23 expected, 19 obtained). However, of the 261 mice born from  $X\alpha af1^{+}/X\beta^{+/-}/X\gamma$  intercrosses, only 10  $X\alpha af1^{\circ}/X\beta/X\gamma$  mutants were obtained (16 expected). But at E14.5,  $X\alpha af1^{\circ}/X\beta/X\gamma$  fetuses were collected at a Mendelian ratio. This indicates that the absence of all RXR AF-1 domains A/B

is not lethal at a developmental stage when organogenesis is almost completed, but results in impaired viability.  $X\alpha af1^{\circ}/X\beta$  and  $X\alpha af1^{\circ}/X\beta/X\gamma$  mutant females were fertile, whereas males were sterile, owing to the loss of RXR $\beta$  (Kastner et al., 1996). In adults, the weight of  $X\alpha af1^{\circ}/X\beta$  mutants was about 10% less than that of  $X\alpha af1^{\circ}$  mutants (data not shown).

A similar bilateral and completely penetrant hindlimb interdigital webbing was observed in  $X\alpha af1^{\circ}/X\beta$  and in  $X\alpha af1^{\circ}/X\beta/X\gamma$  mutants. It was more severe than in  $X\alpha af1^{\circ}$  mutants, as it often affected the full length of interdigital spaces (Fig. 5c and data not shown). E14.5  $X\alpha af1^{\circ}/X\beta$  hindlimbs showed a marked decrease in the number of dying cells within interdigital spaces, as assessed by staining with Nile Blue Sulfate (Fig. 5a). Moreover, the expression of stromelysin 3, an RA-regulated matrix metalloproteinase involved in tissue remodeling processes that accompany apoptosis in developing limbs (Lefebvre et al., 1995; Dupé et al., 1999; Ludwig et al.,

**Table 1. Skeletal and cartilage abnormalities in E18.5  $X\alpha af1^{\circ}$  mutants**

| Abnormalities                                                                                    | Genotypes and number of skeletons examined at E18.5 |                             |
|--------------------------------------------------------------------------------------------------|-----------------------------------------------------|-----------------------------|
|                                                                                                  | Wild type<br>14                                     | $X\alpha af1^{\circ}$<br>20 |
| Abnormalities                                                                                    | 5 (35%)*                                            | 19 (95%)*                   |
| Cranial skeletal abnormalities                                                                   |                                                     |                             |
| Agenesis of metoptic pillar ( $X\alpha af2^{\circ}$ ) (A $\gamma$ )                              |                                                     |                             |
| Unilateral                                                                                       | 2 (15%)                                             | 8 (40%)                     |
| Bilateral                                                                                        | 0                                                   | 3 (15%)                     |
| Axial skeletal abnormalities                                                                     |                                                     |                             |
| Homeotic transformations                                                                         |                                                     |                             |
| Posteriorizations                                                                                |                                                     |                             |
| Posterior tubercle on basioccipital bone ( $X\alpha af2^{\circ}$ ) (A $\beta$ ) (A $\gamma$ )    | 0                                                   | 1 (5%)                      |
| Transformation of C7 to T1 (A $\alpha$ ) (A $\beta$ )                                            | 0                                                   | 4 (20%)                     |
| Anteriorizations                                                                                 |                                                     |                             |
| Eight instead of seven vertebrosteral ribs ( $X\alpha af2^{\circ}$ ) (A $\alpha$ ) (A $\gamma$ ) | 0                                                   | U:2 (10%)                   |
| Malformations                                                                                    |                                                     |                             |
| Fusion of C1-AA with C2 dens ( $X\alpha af2^{\circ}$ ) (A $\alpha$ ) (A $\gamma$ )               | 3 (20%)                                             | 8 (40%)                     |
| C2 bifid ( $X\alpha af2^{\circ}$ ) (A $\gamma$ )                                                 | 0                                                   | 3 (15%)                     |
| Abnormal cricoid cartilage‡ ( $X\alpha af2^{\circ}$ )                                            | 1 (7%)                                              | 7 (35%)                     |

$X\alpha af2^{\circ}$ , A $\alpha$ , A $\beta$ , A $\gamma$ : these abnormalities are also observed in  $X\alpha af2^{\circ}$ , A $\alpha$ , A $\beta$  and A $\gamma$  fetuses.

C1-AA, anterior arch of the atlas; C1 to C7, first to seventh cervical vertebrae; T1 to T14, first to fourteenth thoracic vertebrae; U, unilateral.

\*Number of animals exhibiting malformed skeletons.

‡Ventral extension of the cricoid cartilage. (For further details concerning these abnormalities, see Lohnes et al., 1994; Ghyselinck et al., 1997; Mascrez et al., 1998.)

**Fig. 6.** Comparison of ocular malformations in *X $\alpha$ af1<sup>o</sup>* and *X $\alpha$ af2<sup>o</sup>* compound mutants. Frontal sections through the eye region of WT and mutant fetuses at E14.5 (a-d) and E18.5 (e-k). (h-k) Note that *X $\alpha$ af1<sup>o</sup>/A( $\beta$  or  $\gamma$ )* and *X $\alpha$ af2<sup>o</sup>/A( $\beta$  or  $\gamma$ )* mutants share the same spectrum of ocular defects, although these are systematically more severe in *X $\alpha$ af2<sup>o</sup>* compound mutants. For example, the size of the conjunctival sac (J) and cornea (C) is only slightly reduced in *X $\alpha$ af1<sup>o</sup>/A $\beta$*  and *X $\alpha$ af1<sup>o</sup>/A $\gamma$*  mutants (compare e,j,h) but markedly decreased in *X $\alpha$ af2<sup>o</sup>/A $\beta$*  mutants (i), and absent in *X $\alpha$ af2<sup>o</sup>/A $\gamma$*  mutants (k). Likewise, the stroma of the iris (I), the anterior chamber (A) and the secondary vitreous body (SV) are present in *X $\alpha$ af1<sup>o</sup>/A $\beta$*  and *X $\alpha$ af1<sup>o</sup>/A $\gamma$*  mutants, but not in their *X $\alpha$ af2<sup>o</sup>* counterparts. Note also that in some mutants at E18.5, the relative sizes of the ventral and dorsal retina is not possible to assess due to the existence of retinal folds. A, anterior chamber; C, cornea; D, dorsal retina; E, eyelids; I, iris stroma; J, conjunctival sac; L, lens; M, mesenchyme replacing the eyelids and cornea; N, neural retina; R, persistent hyperplastic primary vitreous; RP, retinal pigment epithelium; SC, sclera; SV, secondary vitreous body. The large arrow points to the optic nerve exit point. The green arrowheads delimit colobomas of the optic disc. The asterisks indicate artefactual detachment of the neural retina from the retinal pigment epithelium occurring during tissue processing. Scale bar in k: 200  $\mu$ m (a-d); 300  $\mu$ m (e,h-k); 40  $\mu$ m (f,g).

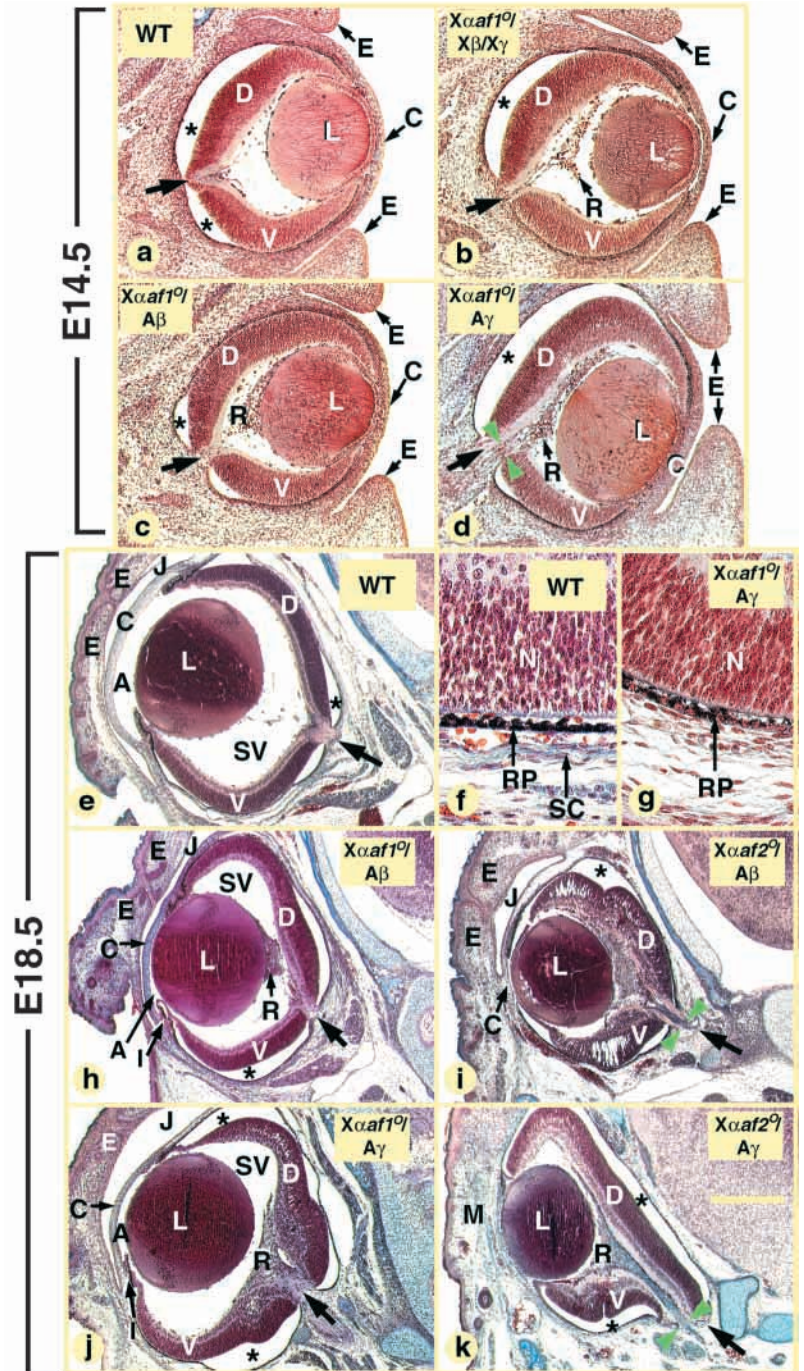

2000), was markedly decreased in the interdigital spaces of E14.5 *X $\alpha$ af1<sup>o</sup>/X $\beta$*  hindlimbs (Fig. 5b). These results indicate that the soft tissue syndactyly seen in a majority of *X $\alpha$ af1<sup>o</sup>* adults, as well as in all *X $\alpha$ af1<sup>o</sup>/X $\beta$* , *X $\alpha$ af1<sup>o</sup>/X $\beta$ /X $\gamma$*  adults, is caused by the persistence of the fetal interdigital mesenchyme.

All E18.5 *X $\alpha$ af1<sup>o</sup>/X $\beta$*  ( $n=4$ ) and E14.5 *X $\alpha$ af1<sup>o</sup>/X $\beta$ /X $\gamma$*  ( $n=9$ ) mutants analyzed histologically displayed a bilateral PHPV (compare Fig. 6a,b; Table 2). In addition, one *X $\alpha$ af1<sup>o</sup>/X $\beta$ /X $\gamma$*  mutant displayed a ventricular myocardial hypoplasia, and another one an agenesis of the conotruncal septum comparable with that of *X $\alpha$*  mutants (Table 3). These data confirm the requirement of A/B domain of RXR in the involution of the interdigital and primary vitreous body mesenchymes, and indicate that it is also involved in cardiac morphogenesis in some individuals.

The putative start codon of RXR $\alpha$ 2 and  $\alpha$ 3, the two RXR $\alpha$  isoforms specifically expressed in the adult testis (Brocard et al., 1996), was removed in *X $\alpha$ af1<sup>o</sup>* mutants. Therefore, the RXR $\alpha$  A/B domain deletion should also result in a null mutation for RXR $\alpha$ 2 and  $\alpha$ 3. This was confirmed by western blot analysis (data not shown). Histological analysis of the testes of *X $\alpha$ af1<sup>o</sup>* adults ( $n=4$ ), which are fertile, did not reveal abnormalities, whereas *X $\alpha$ af1<sup>o</sup>/X $\beta$ /X $\gamma$*  adults ( $n=2$ ), which are sterile because of the RXR $\beta$ -null mutation, did not display any testis defect in addition to those exhibited by X $\beta$ -null mutants (Kastner et al., 1996). Thus, RXR $\alpha$ 2 and RXR $\alpha$ 3 isoforms are not necessary for male fertility.

**In contrast to the RXR $\alpha$  AF-2 function, the RXR $\alpha$  AF-1 domain A/B is dispensable for placentation**

The relative contributions of AF-1 and AF-2 activities to the functions of RXR $\alpha$  in placentation (Sapin et al., 1997; Wendling et al., 1999; Barak et al., 1999) were assessed by comparing wild-type, *X $\alpha$ af1<sup>o</sup>*, *X $\alpha$ af2<sup>o</sup>*, *X $\alpha$ af1<sup>o</sup>/X $\beta$ /X $\gamma$*  and *X $\alpha$ af2<sup>o</sup>/X $\beta$ /X $\gamma$*  placental morphologies. Placentas from E18.5 *X $\alpha$ af1<sup>o</sup>* ( $n=3$ ) and E14.5 *X $\alpha$ af1<sup>o</sup>/X $\beta$ /X $\gamma$*  ( $n=6$ ) mutants were macroscopically and histologically indistinguishable from wild-type placentas (data not shown). Histological defects observed at E14.5 in *X $\alpha$ af2<sup>o</sup>* ( $n=5$ ) and *X $\alpha$ af2<sup>o</sup>/X $\beta$ /X $\gamma$*  ( $n=5$ ) placentas consisted mainly in a thickening of labyrinthine

**Table 2. Abnormalities of the eye and of its adnexae in *Xαaf1<sup>o</sup>* compound mutant fetuses**

|                                                                                                                                                                 | Genotype, age and number of mutant fetuses |                                |                             |        |                             |        |                             |        |
|-----------------------------------------------------------------------------------------------------------------------------------------------------------------|--------------------------------------------|--------------------------------|-----------------------------|--------|-----------------------------|--------|-----------------------------|--------|
|                                                                                                                                                                 | <i>Xαaf1<sup>o</sup>/Xβ</i>                | <i>Xαaf1<sup>o</sup>/Xβ/Xγ</i> | <i>Xαaf1<sup>o</sup>/Aα</i> |        | <i>Xαaf1<sup>o</sup>/Aβ</i> |        | <i>Xαaf1<sup>o</sup>/Aγ</i> |        |
|                                                                                                                                                                 | E18.5                                      | E14.5                          | E14.5                       | E18.5  | E14.5                       | E18.5  | E14.5                       | E18.5  |
| Ocular abnormalities                                                                                                                                            | 3                                          | 9                              | 8                           | 3      | 5                           | 2      | 4                           | 2      |
| <b>Lens abnormalities</b>                                                                                                                                       |                                            |                                |                             |        |                             |        |                             |        |
| Ventral rotation of the lens<br>( <i>Xα*</i> ) ( <i>Xα/Aγ*</i> )‡ ( <i>Xαaf2<sup>o</sup></i> ) ( <i>Xαaf2<sup>o</sup>/Aβ*</i> ; <i>Xαaf2<sup>o</sup>/Aγ*</i> )‡ | 0                                          | 0                              | 0                           | 0      | *                           | ND     | *                           | ND     |
| <b>Mesenchymal defects</b>                                                                                                                                      |                                            |                                |                             |        |                             |        |                             |        |
| Agenesis of the eyelids and cornea<br>( <i>Xα/Aγ*</i> ) ( <i>Xαaf2<sup>o</sup>/Aγ*</i> )                                                                        | 0                                          | 0                              | 0                           | 0      | 0                           | 0      | 0                           | 0      |
| Closer eyelid folds (E14.5)/small conjunctival sac (E18.5)<br>( <i>Xα*</i> ) ( <i>Xα/Aβ*</i> ) ( <i>Xαaf2<sup>o</sup></i> ) ( <i>Xαaf2<sup>o</sup>/Aβ*</i> )    | 0                                          | 0                              | 0                           | 0      | *                           | *      | *                           | *      |
| Thickened corneal stroma<br>( <i>Xα*</i> ) ( <i>Xα/Aβ*</i> ) ( <i>Xαaf2<sup>o</sup></i> ) ( <i>Xαaf2<sup>o</sup>/Aβ*</i> )                                      | 0                                          | 0                              | 0                           | 0      | B: 4/5                      | ND     | *                           | ND     |
| Agenesis of the iris stroma<br>( <i>Xα*</i> ) ( <i>Xαaf2<sup>o</sup>/Aβ*</i> ; <i>Xαaf2<sup>o</sup>/Aγ*</i> )                                                   | 0                                          | NA                             | NA                          | 0      | NA                          | 0      | NA                          | 0      |
| Agenesis of the anterior chamber<br>( <i>Xα*</i> ) ( <i>Xαaf2<sup>o</sup>/Aβ*</i> ; <i>Xαaf2<sup>o</sup>/Aγ*</i> )                                              | 0                                          | NA                             | NA                          | 0      | NA                          | 0      | NA                          | 0      |
| Agenesis of the sclera<br>( <i>Xα*</i> ) ( <i>Xαaf2<sup>o</sup>/Aβ*</i> ; <i>Xαaf2<sup>o</sup>/Aγ*</i> )                                                        | 0                                          | NA                             | NA                          | 0      | NA                          | *      | NA                          | *      |
| Retrolenticular membrane (PHPV)<br>( <i>Xα*</i> ) ( <i>Xα<sup>+/-</sup>/Aβ<sup>+/-</sup></i> ) ( <i>Xαaf2<sup>o</sup>*</i> )                                    | *                                          | *                              | U: 1/8<br>B: 2/8            | B: 1/3 | *                           | *      | *                           | *      |
| <b>Retinal defects</b>                                                                                                                                          |                                            |                                |                             |        |                             |        |                             |        |
| Shortening of ventral retina<br>( <i>Xα*</i> ) ( <i>Xα/Aγ*</i> )‡ ( <i>Xαaf2<sup>o</sup></i> ) ( <i>Xαaf2<sup>o</sup>/Aβ*</i> ; <i>Xαaf2<sup>o</sup>/Aγ*</i> )  | 0                                          | 0                              | 0                           | 0      | *                           | *      | *                           | ND     |
| Coloboma of the optic disc<br>( <i>Xα*</i> ) ( <i>Xαaf2<sup>o</sup>/Aβ</i> ; <i>Xαaf2<sup>o</sup>/Aγ*</i> )                                                     | 0                                          | 0                              | 0                           | 0      | U: 1/5                      | B: 1/2 | U: 1/4<br>B: 1/4            | B: 1/2 |
| <b>Agenesis of Harderian glands</b><br>( <i>Xαaf2<sup>o</sup>/Aβ</i> ; <i>Xαaf2<sup>o</sup>/Aγ*</i> )                                                           | 0                                          | NA                             | NA                          | 0      | NA                          | B: 1/2 | NA                          | *      |
| <b>Agenesis of the naso-lacrimal duct</b><br>( <i>Xαaf2<sup>o</sup>/Aβ</i> ; <i>Xαaf2<sup>o</sup>/Aγ*</i> )                                                     | 0                                          | NA                             | NA                          | 0      | NA                          | 0      | NA                          | *      |

*Xα* and *Xαaf2<sup>o</sup>*, these abnormalities are observed in *Xα* and *Xαaf2<sup>o</sup>* fetuses, respectively; *Xα/Aβ* and *Xα/Aγ*, these abnormalities are observed in *Xα/Aβ* or *Xα/Aγ* double-null mutants; *Xαaf2<sup>o</sup>/Aβ* and *Xαaf2<sup>o</sup>/Aγ*, these abnormalities are observed in *Xαaf2<sup>o</sup>/Aβ* or *Xαaf2<sup>o</sup>/Aγ* double-null mutants.

\*These abnormalities are completely penetrant and bilateral.

‡These abnormalities are more severe than in *Xα* mutants.

B, bilateral; NA, not applicable, as the corresponding structure is not yet formed at E14.5; ND, not determined, as the relationships between the different components of the malformed eye are often difficult to evaluate at this developmental stage (see Fig. 6); U, unilateral. (For further details concerning these abnormalities, see Lohnes et al., 1994; Kastner et al., 1994; Kastner et al., 1997a; Ghyselinck et al., 1997; Mascrez et al., 1998.)

trabeculae, and a lack of clear frontier between the spongiotrophoblastic and the labyrinthine zones. They were similar to those previously detected in *RXRα*-null placentas (Sapin et al., 1997; data not shown).

The outcome of these placental abnormalities was assessed at E18.5: *Xαaf2<sup>o</sup>* placentas were macroscopically distinguishable from wild-type and *Xαaf2<sup>o</sup>/+* placentas by their pale appearance, which reflects a deficiency in red blood cells within the labyrinthine zone (Fig. 7a,b; data not shown). Histological analysis of E18.5 *Xαaf2<sup>o</sup>* placentas ( $n=4$ ) showed (1) an abnormal, wavy aspect of the interface between spongiotrophoblast and labyrinth (Fig. 7c,d); and (2) a thickening of the labyrinthine trabeculae separating fetal capillaries and maternal blood sinuses (Fig. 7e-h). Labyrinthine trabeculae represent the placental barrier across which nutrient and gas exchanges between fetal and maternal blood occur (reviewed by Cross, 2000). Limitation of the rate of fetal-maternal exchanges caused by a thickened placental barrier is probably responsible for in utero growth retardation of *Xαaf2<sup>o</sup>* mutants (Mascrez et al., 1998).

### In absence of a RAR partner, the *RXRα* AF-1 domain A/B becomes essential for embryonic development

The *RXRαaf1<sup>o</sup>* mutation was introduced into *RAR(α, β or γ)*-null genetic backgrounds to assess the functional contribution of the *RXRα* AF-1 domain A/B in *RAR/RXR* heterodimers. Steady-state levels of *RXRαΔA/B* in E12.5 *Xαaf1<sup>o</sup>/A(α, β or γ)* mutant embryos were comparable with those of *RXRα* in *Aα*-, *Aβ*- and *Aγ*-null embryos, respectively (data not shown). Therefore, the abnormal phenotypes seen in *Xαaf1<sup>o</sup>/A(α, β or γ)* mutants most probably reflect the lack of the *RXRα* A/B domain.

*Aα*, *Aβ* and *Aγ* mutants are viable (Kastner et al., 1995; Ghyselinck et al., 1997). In contrast, no living *Xαaf1<sup>o</sup>/Aα* mutants were recovered from *Xαaf1<sup>o</sup>/Aα<sup>+/-</sup>* intercrosses, even though they could be collected at Mendelian ratio at E18.5. Similarly, only few *Xαaf1<sup>o</sup>/Aβ* and *Xαaf1<sup>o</sup>/Aγ* adults were viable (two and one obtained versus ten and seven expected, respectively). The lethality of *Xαaf1<sup>o</sup>/A(α, β or γ)* mutants clearly show that the *RXRα* AF-1 domain A/B is essential, at least in some *RAR* genetic settings.



*X $\alpha$ af1<sup>0</sup>/A* ( $\alpha$ ,  $\beta$  or  $\gamma$ ) compound mutants were analyzed by histology at E14.5 and E18.5. *X $\alpha$ af1<sup>0</sup>/A $\alpha$*  mutants displayed, with a low penetrance, the majority of the cardiovascular, respiratory and urogenital defects previously observed in *X $\alpha$ /A $\alpha$*  mutants (Tables 3, 4; Kastner et al., 1994; Kastner et al., 1997a). Similarly, *X $\alpha$ af1<sup>0</sup>/A $\beta$*  and *X $\alpha$ af1<sup>0</sup>/A $\gamma$*  mutants reproduced a milder form of the ocular defects observed in *X $\alpha$ /A $\beta$*  and *X $\alpha$ /A $\gamma$*  fetuses (Table 2; Kastner et al., 1994; Kastner et al., 1997a), including closer eyelid folds (E in Fig. 6a,c,d), thickening of the ventral portion of the cornea (C), shortening of the ventral retina (V), ventral rotation of the lens (L), coloboma of the optic disc (green arrowheads in Fig. 6d) and absence of the sclera (SC, compare Fig. 6f with 6g). Thus, in a genetic background null for either RAR $\alpha$ , RAR $\beta$  or RAR $\gamma$ , the RXR $\alpha$  A/B domain becomes indispensable for a large subset of RA-dependent functions involved in morphogenesis.

It is interesting to note that the defects observed in *X $\alpha$ af1<sup>0</sup>/A* ( $\alpha$ ,  $\beta$  or  $\gamma$ ) mutants were less penetrant or less severe than those observed in *X $\alpha$ af2<sup>0</sup>/A* ( $\alpha$ ,  $\beta$  or  $\gamma$ ) mutants (Mascres et al., 1998). For example, lung hypoplasia was present in about two thirds of *X $\alpha$ af1<sup>0</sup>/A $\alpha$*  mutants, whereas it is completely penetrant in *X $\alpha$ af2<sup>0</sup>/A $\alpha$*  mutants. One third of *X $\alpha$ af1<sup>0</sup>/A $\beta$*  and *X $\alpha$ af1<sup>0</sup>/A $\gamma$*  mutants displayed a coloboma of the optic disc, an abnormality observed in all *X $\alpha$ af2<sup>0</sup>/A $\beta$*  and *X $\alpha$ af2<sup>0</sup>/A $\gamma$*  mutants. Ocular abnormalities found with the same penetrance in *X $\alpha$ af1<sup>0</sup>/RAR*-null and in *X $\alpha$ af2<sup>0</sup>/RAR*-null mutants, were less severe in *X $\alpha$ af1<sup>0</sup>/RAR*-null mutants. For example, shortening of the ventral retina, ventral rotation of the lens, thickening of the corneal stroma and closer eyelid folds, are less severe in *X $\alpha$ af1<sup>0</sup>/A $\beta$*  and *X $\alpha$ af1<sup>0</sup>/A $\gamma$*  mutants than in *X $\alpha$ af2<sup>0</sup>/A $\beta$*  and *X $\alpha$ af2<sup>0</sup>/A $\gamma$*  mutants (Table 2; Fig. 6c,d; for additional examples, compare Fig. 6h and 6j with 6i and 6k). Altogether, these observations indicate that, for a large fraction of the RAR-dependent events, the functions of the RXR $\alpha$  AF-1 domain A/B are less crucial than those of the AF-2 activity.

#### RAR $\beta$ promoter activity in *X $\alpha$ af1<sup>0</sup>* mutant mice

We also investigated the possible involvement of the RXR $\alpha$  AF-1 domain A/B in the regulation of a transgene, whose expression is under the control of the RAR $\beta$  promoter that contains a RA-reponse element (Mendelsohn et al., 1991). To this end, the RAR $\beta$  promoter-*lacZ* reporter transgene was introduced into the *RXR $\alpha$ af1<sup>0</sup>* genetic background. At E13.5, *lacZ* expression was similar in *X $\alpha$ af1<sup>0</sup>* ( $n=9$ ) and wild-type ( $n=13$ ) fetuses (data not shown). In order to eliminate a functional compensation by RXR $\beta$  (Mascres et al., 1998; Wendling et al., 1999), *lacZ* expression was also studied in *X $\alpha$ af1<sup>0</sup>/X $\beta$*  mutants. At E13.5, expression of *lacZ* was similar in wild-type ( $n=13$ ) and *X $\alpha$ af1<sup>0</sup>/X $\beta$*  ( $n=9$ ) fetuses, including the interdigital regions (data not shown). Altogether, these data indicate that the RXR $\alpha$  AF-1 domain A/B, in contrast to RXR $\alpha$  AF-2 (Mascres et al., 1998), is dispensable for in vivo transactivation by RXR $\alpha$ , at least in the context of the RAR $\beta$  promoter.

#### DISCUSSION

The RXR $\alpha$  deletion created in the present study encompasses most of the N-terminal A/B domain. This region contains the autonomous ligand-independent transcriptional activation

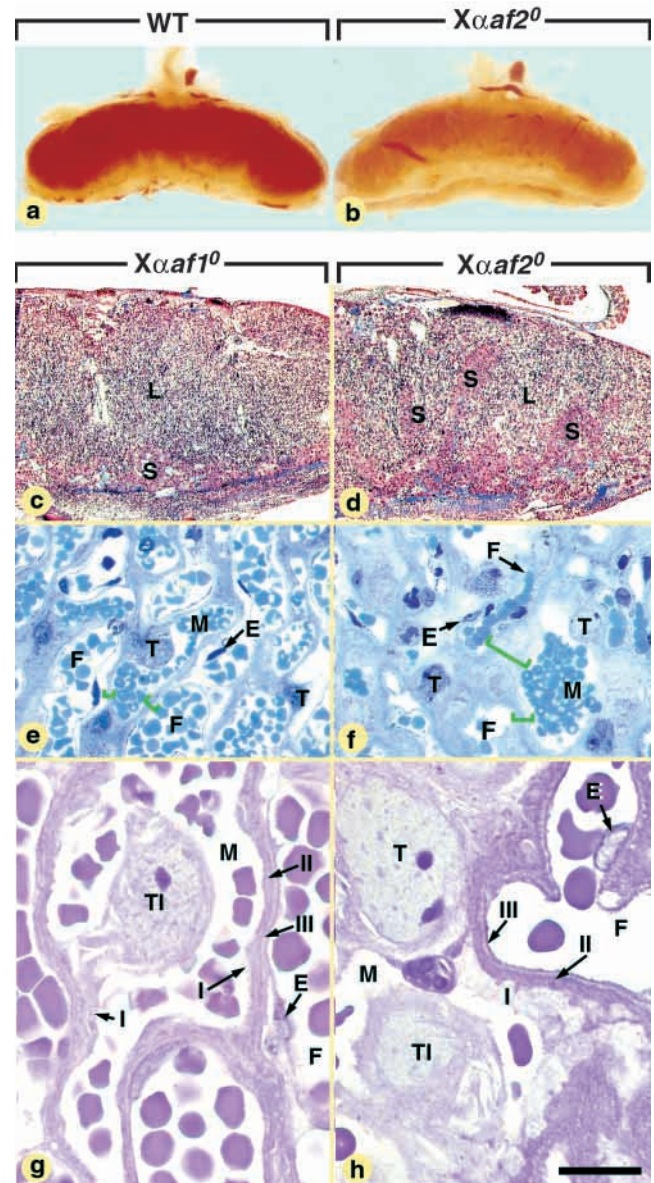

**Fig. 7.** Comparison of E18.5 wild-type (WT), *X $\alpha$ af1<sup>0</sup>* and *X $\alpha$ af2<sup>0</sup>* placentas. (a,b) Halved placentas from the same litter fixed in glutaraldehyde. (c-d) Histological sections from paraffin-embedded placentas. (e-h) Semithin sections: labyrinthine trabeculae consist of three layers of trophoblast cells (designated I, II and III counting from the maternal towards the fetal blood spaces) and of the endothelium lining fetal capillaries; the trabecular thickening in *X $\alpha$ af2<sup>0</sup>* placenta affects mainly layers I and II. E, nuclei of endothelial cells; F, fetal (allantoic) capillary; L, labyrinthine zone; M, maternal blood sinuses; S, spongiotrophoblast; T, nuclei of trophoblast cells; TI, nuclei of trophoblast cells from layer one; I, II and III, first, second and third layer of labyrinthine trabeculae. The green brackets delimit the placental barrier. Modified Mallory's trichrome (c,d), Toluidine Blue (e,f) and periodic acid-schiff (g,h). (a) and (b) are displayed at the same magnification. Scale bar: 500  $\mu$ m (c,d); 25  $\mu$ m (e,f); 12  $\mu$ m (g,h).

function, AF-1, which exhibits some specificity in transfected cells in vitro, depending upon the cell-type and promoter context (Nagpal et al., 1992; Nagpal et al., 1993). Little is

**Table 3. Abnormalities of the cardiovascular system, the respiratory system and certain glands in *Xαaf1<sup>o</sup>* compound mutant fetuses**

| Abnormalities                                                                                                                                                                                                                                              | Genotype, age and number of mutant fetuses |                                           |                             |            |                             |            |                             |            |
|------------------------------------------------------------------------------------------------------------------------------------------------------------------------------------------------------------------------------------------------------------|--------------------------------------------|-------------------------------------------|-----------------------------|------------|-----------------------------|------------|-----------------------------|------------|
|                                                                                                                                                                                                                                                            | <i>Xαaf1<sup>o</sup>/</i><br><i>Xβ</i>     | <i>Xαaf1<sup>o</sup>/</i><br><i>Xβ/Xγ</i> | <i>Xαaf1<sup>o</sup>/Aα</i> |            | <i>Xαaf1<sup>o</sup>/Aβ</i> |            | <i>Xαaf1<sup>o</sup>/Aγ</i> |            |
|                                                                                                                                                                                                                                                            | E18.5<br>3                                 | E14.5<br>9                                | E14.5<br>8                  | E18.5<br>3 | E14.5<br>5                  | E18.5<br>2 | E14.5<br>4                  | E18.5<br>2 |
| <b>Cardiovascular defects</b>                                                                                                                                                                                                                              |                                            |                                           |                             |            |                             |            |                             |            |
| Ventricular myocardial hypoplasia<br>( <i>Xα*</i> ) ( <i>Xαaf2<sup>o</sup></i> ) ( <i>Xαaf2<sup>o</sup>/Aα</i> )                                                                                                                                           | 0                                          | 1                                         | 4                           | 1          | 0                           | 0          | 0                           | 0          |
| Agenesis of the conotruncal septum (14.5dpc)/high VSD (18.5dpc)<br>( <i>Xα</i> ) ( <i>Xα/Aα*</i> ; <i>Xα/Aβ*</i> ; <i>Xα/Aγ</i> ) ( <i>Xαaf2<sup>o</sup></i> ) ( <i>Xαaf2<sup>o</sup>/Aα</i> ; <i>Xαaf2<sup>o</sup>/Aβ</i> ; <i>Xαaf2<sup>o</sup>/Aγ</i> ) | 0                                          | 1                                         | 2                           | 1          | 0                           | 0          | 0                           | 0          |
| Persistent truncus arteriosus (PTA)<br>( <i>Xα/Aα*</i> ; <i>Xα/Aβ</i> ; <i>Xα/Aγ</i> ) ( <i>Xαaf2<sup>o</sup>/Aα</i> )                                                                                                                                     | 0                                          | 0                                         | 2                           | 0          | 0                           | 0          | 0                           | 0          |
| Abnormal arteries derived from Ao.A.3-6<br>( <i>Xα/Aα&gt;Xα/Aβ</i> and <i>Xα/Aγ</i> ) ( <i>Xαaf2<sup>o</sup>/Aα</i> ; <i>Xαaf2<sup>o</sup>/Aβ</i> )                                                                                                        | 0                                          | 0                                         | 1                           | 0          | 0                           | 0          | 0                           | 0          |
| <b>Respiratory system abnormalities</b>                                                                                                                                                                                                                    |                                            |                                           |                             |            |                             |            |                             |            |
| Hypoplastic left lung<br>( <i>Xα/Aα</i> ) ( <i>Xαaf2<sup>o</sup>/Aα*</i> ; <i>Xαaf2<sup>o</sup>/Aβ</i> )                                                                                                                                                   | 0                                          | 0                                         | 6                           | 1          | 0                           | 0          | 0                           | 0          |
| Hypoplastic right lung<br>( <i>Xα/Aα</i> ) ( <i>Xαaf2<sup>o</sup>/Aα*</i> ; <i>Xαaf2<sup>o</sup>/Aβ</i> )                                                                                                                                                  | 0                                          | 0                                         | 6                           | 1          | 0                           | 0          | 0                           | 0          |
| Agenesis of oesophagotracheal septum<br>( <i>Xα/Aα&gt;Xα/Aβ</i> ) ( <i>Xαaf2<sup>o</sup>/Aα</i> ; <i>Xαaf2<sup>o</sup>/Aβ</i> )                                                                                                                            | 0                                          | 0                                         | 1 (P)                       | 0          | 1 (P)                       | 0          | 0                           | 0          |
| <b>Glandular abnormalities</b>                                                                                                                                                                                                                             |                                            |                                           |                             |            |                             |            |                             |            |
| Shortening of the sublingual duct<br>( <i>Xαaf2<sup>o</sup>/Aβ*</i> ; <i>Xαaf2<sup>o</sup>/Aγ*</i> )                                                                                                                                                       | 0                                          | 0                                         | NA                          | 0          | NA                          | 0          | NA                          | *          |

*Xα* and *Xαaf2<sup>o</sup>*, these abnormalities are observed in *Xα* and *Xαaf2<sup>o</sup>* fetuses, respectively; *Xα/Aα*, *Xα/Aβ* and *Xα/Aγ*, these abnormalities are observed in *Xα/Aα*, *Xα/Aβ* or *Xα/Aγ* double-null mutants; *Xαaf2<sup>o</sup>/Aα*, *Xαaf2<sup>o</sup>/Aβ* and *Xαaf2<sup>o</sup>/Aγ*, these abnormalities are observed in *Xαaf2<sup>o</sup>/Aα*, *Xαaf2<sup>o</sup>/Aβ* or *Xαaf2<sup>o</sup>/Aγ* double-null mutants; AoA.3-6, third, fourth and sixth aortic arches – the abnormality consisted in an arch of the aorta on the right side.

\*These abnormalities are completely penetrant and bilateral.

P, partial; NA, not applicable as the corresponding structure is not yet formed at E14.5. VSD, ventricular septal defect. (For further details concerning these abnormalities, see Mendelsohn et al., 1994; Kastner et al., 1994; Kastner et al., 1997a; Ghyselinck et al., 1997; Mascrez et al., 1998.)

known about the molecular mechanisms through which RXR $\alpha$  AF-1 domain A/B exerts its transcriptional activity. For other members of the nuclear receptor superfamily, e.g. PPAR $\gamma$ , the A/B domain has been shown to interact directly with co-activators, e.g. PGC-2 (Castillo et al., 1999). Along the same lines, phosphorylation of the A/B domain may modulate either the interaction of receptors with co-activators or their affinity for ligands. For example, phosphorylation of ER $\beta$  A/B domain promotes recruitment of the SRC-1 co-activator (Tremblay et al., 1999), whereas phosphorylation of the A/B domain reduces the ligand-binding affinity of PPAR $\gamma$ , thus negatively regulating the transcriptional activity of PPAR $\gamma$  (Shao et al., 1998). In F9 cells, phosphorylation of the RAR $\gamma$  A/B domain is required not only for induction of several RA-target genes (Taneja et al., 1997; Rochette-Egly et al., 1997; Bastien et al., 2000), but also for receptor degradation by the ubiquitin-proteasome pathway (Kopf et al., 2000). At least some of these features could probably be extended to RXR $\alpha$ , which is phosphorylated at several serine and threonine residues in the A/B domain (Adam-Stitah et al., 1999). The present investigation was designed to establish the developmental role of the RXR $\alpha$  A/B region, as a prerequisite to further genetic and molecular studies aimed at elucidating the molecular mechanisms that underlie physiological events in vivo.

### The AF-1 domain A/B of RXR $\alpha$ is required for the transduction of retinoic acid signals during development

Involution of the primary vitreous body and of the hindlimb

interdigital mesenchyme, and cardiomyocyte differentiation and morphogenesis of some cranial skeletal elements and vertebrae are impaired in *Xαaf1<sup>o</sup>* mutants (this study), in RAR( $\alpha$ ,  $\beta$  and  $\gamma$ ) mutants (Lohnes et al., 1993; Ghyselinck et al., 1997; Kastner et al., 1997b) and in animals with vitamin A and RA deficiency (Wilson et al., 1953; Lussier et al., 1993). It appears therefore that in RXR $\alpha$ /RAR heterodimers, the AF-1 domain A/B of RXR $\alpha$  participates in the transduction of retinoid signals normally required for the completion of these developmental events. The observation that the developmental defects exhibited by the *Xαaf1<sup>o</sup>/Xβ/Xγ* mutants can all be attributed to abnormalities in the RAR/RXR signaling pathway suggest that RXR partners other than RAR do not exert any developmental function that require the RXR $\alpha$  A/B region.

During development, RXR $\alpha$  is the most important RXR, as *Xα* fetuses die in utero and display severe cardiac and ocular defects, whereas *Xβ/Xγ* mutants are viable and do not exhibit any congenital defects (Kastner et al., 1994; Krezel et al., 1996). However, a lack of RXR $\alpha$  or its AF-2 activity can be functionally compensated by RXR $\beta$  and RXR $\gamma$  in mouse embryos, as the spectrum of defects observed in *Xα/Xβ* and *Xαaf2<sup>o</sup>/Xβ/Xγ* mutants is much broader than that of *Xα* mutants (Mascrez et al., 1998; Wendling et al., 1999). RXR $\beta$  and RXR $\gamma$  also compensate for the deletion of RXR $\alpha$  A/B domain, as the PHPV and the hindlimb interdigital webbing become completely penetrant and eventually more severe in *Xαaf1<sup>o</sup>/Xβ/Xγ* mutants; however, no additional abnormalities are generated in these latter mutants, except for single cases of myocardial hypoplasia and conotruncal septum agenesis. Thus,

**Table 4. Abnormalities of the urogenital tract in *X $\alpha$ af1<sup>o</sup>* compound mutant fetuses**

| Abnormalities                                                                                                                                                                                                                                                                       | Mutant genotype, age and number (male:female) of mutant fetuses |        |                                                                |       |                                                                 |       |
|-------------------------------------------------------------------------------------------------------------------------------------------------------------------------------------------------------------------------------------------------------------------------------------|-----------------------------------------------------------------|--------|----------------------------------------------------------------|-------|-----------------------------------------------------------------|-------|
|                                                                                                                                                                                                                                                                                     | <i>X<math>\alpha</math>af1<sup>o</sup>/A<math>\alpha</math></i> |        | <i>X<math>\alpha</math>af1<sup>o</sup>/A<math>\beta</math></i> |       | <i>X<math>\alpha</math>af1<sup>o</sup>/A<math>\gamma</math></i> |       |
|                                                                                                                                                                                                                                                                                     | E14.5                                                           | E18.5  | E14.5                                                          | E18.5 | E14.5                                                           | E18.5 |
|                                                                                                                                                                                                                                                                                     | 4:4                                                             | 1:2    | 3:2                                                            | 1:1   | 1:3                                                             | 0:2   |
| <b>Kidney abnormalities</b>                                                                                                                                                                                                                                                         |                                                                 |        |                                                                |       |                                                                 |       |
| Agenesis ( <i>X<math>\alpha</math>/A<math>\alpha</math></i> ) ( <i>X<math>\alpha</math>af2<sup>o</sup>/A<math>\alpha</math></i> )                                                                                                                                                   | U: 2/8<br>B: 1/8                                                | 0      | 0                                                              | 0     | 0                                                               | 0     |
| Hypoplasia ( <i>X<math>\alpha</math>/A<math>\alpha</math></i> ) ( <i>X<math>\alpha</math>af2<sup>o</sup>/A<math>\alpha</math></i> ; <i>X<math>\alpha</math>af2<sup>o</sup>/A<math>\gamma</math></i> )                                                                               | U: 2/8<br>B: 2/8                                                | B: 1/3 | 0                                                              | 0     | 0                                                               | 0     |
| Hydronephrosis ( <i>X<math>\alpha</math>af2<sup>o</sup>/A<math>\beta</math>*</i> )                                                                                                                                                                                                  | NA                                                              | NA     | NA                                                             | 1/2   | NA                                                              | NA    |
| <b>Ureter abnormalities</b>                                                                                                                                                                                                                                                         |                                                                 |        |                                                                |       |                                                                 |       |
| Agenesis of ureter, partial or complete ( <i>X<math>\alpha</math>/A<math>\alpha</math></i> ; <i>X<math>\alpha</math>/A<math>\beta</math></i> ) ( <i>X<math>\alpha</math>af2<sup>o</sup>/A<math>\beta</math></i> ; <i>X<math>\alpha</math>af2<sup>o</sup>/A<math>\gamma</math></i> ) | U: 2/8<br>B: 1/8                                                | 0      | 0                                                              | 0     | 0                                                               | 0     |
| <b>Agnesis of the Müllerian duct (14.5 dpc) or of its derivatives (18.5 dpc females)</b>                                                                                                                                                                                            |                                                                 |        |                                                                |       |                                                                 |       |
| Complete ( <i>X<math>\alpha</math>/A<math>\alpha</math>*</i> )                                                                                                                                                                                                                      | 4/8                                                             | 0      | 0                                                              | 0     | 0                                                               | 0     |
| Partial (caudal portion missing) ( <i>X<math>\alpha</math>/A<math>\beta</math></i> ; <i>X<math>\alpha</math>/A<math>\gamma</math></i> ) ( <i>X<math>\alpha</math>af2<sup>o</sup>/A<math>\alpha</math>*</i> ; <i>X<math>\alpha</math>af2<sup>o</sup>/A<math>\beta</math></i> )       | U: 1/8<br>B: 3/8                                                | 0      | B: 1/5                                                         | 0     | 0                                                               | 0     |

*X $\alpha$*  and *X $\alpha$ af2<sup>o</sup>*, these abnormalities are observed in *X $\alpha$*  and *X $\alpha$ af2<sup>o</sup>* fetuses, respectively; *X $\alpha$ /A $\alpha$* , *X $\alpha$ /A $\beta$*  and *X $\alpha$ /A $\gamma$* , these abnormalities are observed in *X $\alpha$ /A $\alpha$* , *X $\alpha$ /A $\beta$*  or *X $\alpha$ /A $\gamma$*  double-null mutants; *X $\alpha$ af2<sup>o</sup>/A $\alpha$* , *X $\alpha$ af2<sup>o</sup>/A $\beta$*  and *X $\alpha$ af2<sup>o</sup>/A $\gamma$* , these abnormalities are observed in *X $\alpha$ af2<sup>o</sup>/A $\alpha$* , *X $\alpha$ af2<sup>o</sup>/A $\beta$*  or *X $\alpha$ af2<sup>o</sup>/A $\gamma$*  double-null mutants.

\*These abnormalities are completely penetrant and bilateral; B, bilateral; NA, not applicable: hydronephrosis was never observed in any of our previous mutants at this developmental stage; U, unilateral. (For details see Mendelsohn et al., 1994; Kastner et al., 1994; Kastner et al., 1997a; Ghyselinck et al., 1997; Mascres et al., 1998.)

the functional compensation by RXR $\beta$  or RXR $\gamma$  cannot account for the 'weak' phenotype of the *X $\alpha$ af1<sup>o</sup>* mutants.

Two scenarios could account for the paucity of the developmental defects in *X $\alpha$ af1<sup>o</sup>* and *X $\alpha$ af1<sup>o</sup>/X $\beta$ /X $\gamma$*  mutants. First, the A/B domain might in fact be dispensable for the majority of the developmental events that require RXR $\alpha$ . Given the phenotypes of the various *X $\alpha$ af1<sup>o</sup>/RAR( $\alpha$ ,  $\beta$  or  $\gamma$ )* mutants (see below and Tables 2-4), this possibility is unlikely. Alternatively, the RXR $\alpha$  A/B domain might be necessary for optimal transactivation of several developmental target genes, through RXR $\alpha$ /RAR heterodimers. According to this second scenario, the contribution of the RXR $\alpha$  A/B domain to the transactivation potential of the heterodimers might not be detectable in the protected environment of the animal facility, unless the phenotyping techniques are sophisticated enough, or the examined sample size becomes very large (Brookfield, 1992; Thomas, 1993). Our findings that one out of nine *X $\alpha$ af1<sup>o</sup>/X $\beta$ /X $\gamma$*  mutants displays a hypoplasia of the ventricular myocardium and that another one of these nine has an agnesis of the conotruncal septum, defects that are characteristic of the RXR $\alpha$ -null phenotype but have never been observed in the several dozens of wild-type embryos that we have analyzed over the past 10 years, support the second scenario (Kastner et al., 1994; Sucov et al., 1994). The requirement of RXR $\alpha$  A/B domain for myocardial growth or fusion of conotruncal ridges in some fetuses might then reflect stochastic inter-individual variations in the expression of other synergistic factors involved in RA-dependent cardiac morphogenesis. This hypothesis predicts that more VAD-related developmental abnormalities might be detected if a larger sample of *X $\alpha$ af1<sup>o</sup>/X $\beta$ /X $\gamma$*  fetuses were examined.

Other evidence supporting the conclusion that the RXR $\alpha$  AF-1 domain A/B could be necessary for transactivation by the various RXR $\alpha$ /RAR heterodimers is suggested by the observation that the corresponding *X $\alpha$ af1<sup>o</sup>/RAR( $\alpha$ ,  $\beta$  or  $\gamma$ )* mutants display most of the VAD-related defects observed in

the cognate *X $\alpha$ /RAR( $\alpha$ ,  $\beta$  or  $\gamma$ )* double mutants (Kastner et al., 1994; Kastner et al., 1997a). In fact, in the absence of a given RAR, the RXR $\alpha$  A/B domain becomes essential for enabling the remaining RARs to functionally replace the missing one (discussed by Kastner et al., 1997a; Chiba et al., 1997a; Chiba et al., 1997b; Mascres et al., 1998; see Tables 2-4). Altogether, these data favor the involvement of RXR $\alpha$  AF-1 domain A/B in most of the developmental events that are mediated through the various RAR/RXR $\alpha$  heterodimers, under conditions where either RAR and/or retinoid levels become limited.

### The RXR $\alpha$ AF-1, but not the AF-2 activity appears dispensable for placentation

Thickening of the labyrinthine trabeculae and lack of definite frontier between the labyrinth and spongiotrophoblast are hallmark features of RXR $\alpha$ <sup>-/-</sup> placentas, and probably reflect a failure of a late step of trophoblast cells differentiation (Sapin et al., 1997). Our data show that the RXR A/B domain appears largely unnecessary for the differentiation of trophoblast cells. In contrast, the AF-2 of RXR $\alpha$  is clearly essential for this differentiation process, as (1) *X $\alpha$ af2<sup>o</sup>* placentas are histologically indistinguishable from placentas that lack RXR $\alpha$ ; and (2) defects of *X $\alpha$ af2<sup>o</sup>/X $\beta$ /X $\gamma$*  placentas are not more severe than in *X $\alpha$ af2<sup>o</sup>*. Furthermore, as *X $\alpha$ af2<sup>o</sup>/RAR( $\alpha$ ,  $\beta$  or  $\gamma$ )* mutants are obtained at the expected Mendelian ratio at E18.5, and are not more growth deficient than *X $\alpha$ af2<sup>o</sup>* mutants (B. M., M. M., N. B. G. and P. C., unpublished), it is likely that terminal differentiation of labyrinthine trophoblast cells involves heterodimers in which RXR $\alpha$  is transcriptionally active, but distinct from RXR $\alpha$ /RAR heterodimers. On the other hand, the formation of the labyrinthine zone of the placenta is totally inhibited in *X $\alpha$ /X $\beta$*  mutants, and severely impaired in PPAR $\gamma$  mutants, leading to embryonic death before E10.5 (Wendling et al., 1999; Barak et al., 1999). Thus, RXR $\alpha$  and RXR $\beta$ , probably in the form of PPAR $\gamma$ /RXR heterodimers, have an early role in placentogenesis. We have shown that

$X\alpha f1^0/X\beta/X\gamma$  and  $X\alpha f2^0/X\beta/X\gamma$  mutants do not display these early defects. Thus, neither the RXR $\alpha$  AF-1 domain A/B nor the AF-2 activity is required on their own in early placental development, suggesting that RXRs could act in this process as silent partners with PPAR $\gamma$ . Studies with RXR $\alpha$  mutants that lack both AF-1 and AF-2 are in progress to investigate this possibility further.

### The RXR $\alpha$ AF-1 domain A/B is specifically required for involution of the interdigital mesenchyme

Among the various RA-dependent morphogenetic events involving the RXR $\alpha$  AF-1 domain A/B, separation of the digits is the only one that specifically requires this region, as  $X\alpha f1^0$  and  $X\alpha f1^0/X\beta/X\gamma$  mutants display soft tissue syndactyly of the hindlimbs, whereas  $X\alpha f2^0$  and  $X\alpha f2^0/X\beta/X\gamma$  mutants never display this defect (Mascrez et al., 1998). Phosphorylation of RXR $\alpha$  at a specific serine residue located in the A/B domain is necessary for the antiproliferative response of F9 teratocarcinoma cells to RA (Rochette-Egly and Chambon, 2001). It is noteworthy that RA-dependent involution of the interdigital mesenchyme results from arrest of cell proliferation, as well as from apoptosis (Dupé et al., 1999). Therefore, the possibility exists that phosphorylation of the RXR $\alpha$  A/B domain might have important functions in the cascade of molecular events that, in vivo, leads to the normal disappearance of the interdigital mesenchyme.

### The AF-1 and AF-2 activities of RXR $\alpha$ are differentially required for transducing retinoic acid signals during development

AF-1 and AF-2 activities do not have the same importance in the transcriptional activity of RXR $\alpha$  during embryonic development: (1)  $X\alpha f2^0/X\beta/X\gamma$  fetuses display a large array of congenital defects not found in  $X\alpha f1^0/X\beta/X\gamma$  fetuses; and (2)  $X\alpha f2^0/RAR(\alpha, \beta \text{ or } \gamma)$  compound fetuses are more severely affected than  $X\alpha f1^0/RAR(\alpha, \beta \text{ or } \gamma)$  fetuses (Mascrez et al., 1998; see Tables 2-4). Moreover, the AF-2, but not the AF-1 of RXR $\alpha$  is crucial for the transcription of the  $RAR\beta2-lacZ$  transgene (Mascrez et al., 1998; this study). At the molecular level, little is known about the mechanism through which AF-1 activates transcription. In the case of ER $\alpha$ , AF-1 and AF-2 appear to interact simultaneously in vitro with distinct interfaces of the TIF2 co-activator, leading to synergistic activation of transcription (Benecke et al., 2000). Our present data showing that similar abnormalities are exhibited by  $X\alpha f1^0/RAR(\alpha, \beta \text{ or } \gamma)$  and  $X\alpha f2^0/RAR(\alpha, \beta \text{ or } \gamma)$  compound mutants, although more severe in the latter case, not only suggest that RXR $\alpha$  AF-1 and AF-2 may synergize in vivo as they do in vitro (Nagpal et al., 1993), but also that AF-2 is more important than AF-1 for most of the developmental events that require RXR $\alpha$ /RAR heterodimers.

We thank C. Birling-Ziegler, I. Michel, B. Weber, C. Dennenfeld and B. Féret; the staff of IGBMC common services, ES cell culture and animal facility for their excellent technical assistance; P. Kastner for the gift of plasmids and helpful discussions; J. Brocard for CMV-Cre mice; C. Rochette-Egly for gift of the antibodies; M. C. Rio for stromelysin-3 probe; N. Messaddeq for transmission microscopy; C. Werlé and the secretarial staff for their help in the preparation of this manuscript. This work was supported by funds from the Centre National de la Recherche Scientifique (CNRS), the Institut National de la Santé et de la Recherche Médicale (INSERM), the Hôpital

Universitaire de Strasbourg, the Collège de France, the Institut Universitaire de France, the Association pour la Recherche sur le Cancer (ARC) and Bristol-Myers Squibb. B. M. was the recipient of fellowships from the French Ministry of Research, the Ligue Nationale contre le Cancer, the Association pour la Recherche contre le Cancer and the Université Louis Pasteur.

## REFERENCES

- Adam-Stitah, S., Penna, L., Chambon, P. and Rochette-Egly, C. (1999). Hyperphosphorylation of the retinoid X receptor alpha by activated c-Jun NH2-terminal kinases. *J. Biol. Chem.* **274**, 18932-18941.
- Andrews, N. C. and Faller, D. V. (1991). A rapid micropreparation technique for extraction of DNA-binding proteins from limiting numbers of mammalian cells. *Nucl. Acids Res.* **19**, 2499.
- Apfel, C. M., Kamber, M., Klaus, M., Mohr, P., Keidel, S. and Le Motte, P. K. (1995). Enhancement of HL-60 differentiation by a new class of retinoids with selective activity on retinoid X receptor. *J. Biol. Chem.* **270**, 30765-30772.
- Barak, Y., Nelson, M. C., Ong, E. S., Jones, Y. Z., Ruiz-Lozano, P., Chien, K. R., Koder, A. and Evans, R. M. (1999). PPAR gamma is required for placental, cardiac, and adipose tissue development. *Mol. Cell* **4**, 585-595.
- Bastien, J., Adam-Stitah, S., Riedl, T., Egly, J. M., Chambon, P. and Rochette-Egly, C. (2000). TFIIF interact with the retinoic acid receptor gamma and phosphorylates its AF-1-activating domain through cdk7. *J. Biol. Chem.* **275**, 21896-21904.
- Benecke, A., Chambon, P. and Gronemeyer, H. (2000). Synergy between estrogen receptor  $\alpha$  activation functions AF1 and AF2 mediated by transcription intermediary factor TIF2. *EMBO Reports* **1**, 151-157.
- Botling, J., Castro, D. S., Oberg, F., Nilsson, K. and Perlmann, T. (1997). Retinoic acid receptor/retinoid X receptor heterodimers can be activated through both subunits providing a basis for synergistic transactivation and cellular differentiation. *J. Biol. Chem.* **272**, 9443-9449.
- Bourguet, W., Ruff, M., Chambon, P., Gronemeyer, H. and Moras, D. (1995). Crystal structure of the ligand-binding domain of the human nuclear receptor RXR-alpha. *Nature* **375**, 377-382.
- Brocard, J., Kastner, P. and Chambon, P. (1996). Two novel RXR alpha isoforms from mouse testis. *Biochem. Biophys. Res. Commun.* **229**, 211-218.
- Brookfield, J. (1992). Can genes be truly redundant? *Curr. Biol.* **2**, 553-554.
- Castillo, G., Brun, R. P., Rosenfield, J. K., Hauser, S., Won Park, C., Troy, A. E., Wright, M. E. and Spiegelman, B. M. (1999). An adipogenic cofactor bound by the differentiation domain of PPAR $\gamma$ . *EMBO J.* **18**, 3676-3687.
- Chambon, P. (1996). A decade of molecular biology of retinoic acid receptors. *FASEB J.* **10**, 940-954.
- Chen, J. Y., Clifford, J., Zusi, C., Starrett, J., Tortolani, D., Ostrowski, J., Reczek, P. R., Chambon, P. and Gronemeyer, H. (1996). Two distinct actions of retinoid-receptor ligands. *Nature* **382**, 819-822.
- Chiang, M. Y., Misner, D., Kempermann, G., Schikorski, T., Giguere, V., Sucov, H. M., Gage, F. H., Stevens, C. F., Evans, R. M. (1998). An essential role for retinoid receptors RARbeta and RXRgamma in long-term potentiation and depression. *Neuron* **21**, 1353-1361.
- Chiba, H., Clifford, J., Metzger, D. and Chambon, P. (1997a). Distinct retinoid X receptor-retinoic acid receptor heterodimers are differentially involved in the control of expression of retinoid target genes in F9 embryonal carcinoma cells. *Mol. Cell. Biol.* **17**, 3013-3020.
- Chiba, H., Clifford, J., Metzger, D. and Chambon, P. (1997b). Specific and redundant functions of retinoid X Receptor/Retinoic acid receptor heterodimers in differentiation, proliferation, and apoptosis of F9 embryonal carcinoma cells. *J. Cell. Biol.* **139**, 735-747.
- Clifford, J., Chiba, H., Sobieszczuk, D., Metzger, D. and Chambon, P. (1996). RXRalpha-null F9 embryonal carcinoma cells are resistant to the differentiation, anti-proliferative and apoptotic effects of retinoids. *EMBO J.* **15**, 4142-4155.
- Cross, J. C. (2000). Genetic insights into trophoblast differentiation and placental morphogenesis. *Cell. Dev. Biol.* **11**, 105-113.
- Dente, L., Cesareni, G. and Cortese, R. (1983). pEMBL: a new family of single stranded plasmids. *Nucleic Acids Res.* **11**, 1645-1655.
- Dickman, E. D., Thaller, C. and Smith, S. M. (1997). Temporally-regulated retinoic acid depletion produces specific neural crest, ocular and nervous system defects. *Development* **124**, 3111-3121.
- Dowhan, D. H. and Muscat, G. E. (1996). Characterization of the AB (AF-

- 1) region in the muscle-specific retinoid X receptor-gamma: evidence that the AF-1 region functions in a cell-specific manner. *Nucleic Acids Res.* **24**, 264-271.
- Dupé, V., Ghyselinck, N. B., Thomazy, V., Nagy, L., Davies, P. J. A., Chambon, P. and Mark, M. (1999). Essential roles of retinoic acid signaling in interdigital apoptosis and control of BMP-7 expression in mouse autopods. *Dev. Biol.* **208**, 30-43.
- Dupé, V., Davenne, M., Brocard, J., Dollé, P., Mark, M., Dierich, A., Chambon, P. and Rijli, F. M. (1997). In vivo functional analysis of the Hoxa-1 3' retinoic acid response element (3'RARE). *Development* **124**, 399-410.
- Fehlings, M. G. and Tator, C. H. (1995) The relationships among the severity of spinal cord injury, residual neurological function, axon counts, and counts of retrogradely labeled neurons after experimental spinal cord injury. *Exp. Neurol.* **132**, 220-228.
- Fleischhauer, K., Park, J. H., DiSanto, J. P., Marks, M., Ozato, K. and Yang, S. Y. (1992). Isolation of a full-length cDNA clone encoding a N-terminally variant form of the human retinoid X receptor beta. *Nucleic Acids Res.* **20**, 1801.
- Ghyselinck, N. B., Dupé, V., Dierich, A., Messaddeq, N., Garnier, J. M., Rochette-Egly, C., Chambon, P. and Mark, M. (1997). Role of the retinoic acid receptor beta (RARbeta) during mouse development. *Int. J. Dev. Biol.* **41**, 425-447.
- Gu, H., Zou, Y. R. and Rajewsky, K. (1993). Independent control of immunoglobulin switch recombination at individual switch regions evidenced through Cre-loxP-mediated gene targeting. *Cell* **73**, 1155-1164.
- Horn, V., Minucci, S., Ogryzko, V. V., Adamson, E. D., Howard, B. H., Levin, A. A. and Ozato, K. (1996). RAR and RXR selective ligands cooperatively induce apoptosis and neuronal differentiation in P19 embryonal carcinoma cells. *FASEB J.* **10**, 1071-1077.
- Kastner, P., Grondona, J. M., Mark, M., Gansmuller, A., Le Meur, M., Décimo, D., Vonesch, J. L., Dollé, P. and Chambon, P. (1994). Genetic analysis of RXR alpha developmental function: convergence of RXR and RAR signaling pathways in heart and eye morphogenesis. *Cell* **78**, 987-1003.
- Kastner, P., Mark, M. and Chambon, P. (1995). Nonsteroid nuclear receptors: what are genetic studies telling us about their role in real life? *Cell* **83**, 859-869.
- Kastner, P., Mark, M., Leid, M., Gansmuller, A., Chin, W., Grondona, J. M., Décimo, D., Krezel, W., Dierich, A. and Chambon, P. (1996). Abnormal spermatogenesis in RXR beta mutant mice. *Genes Dev.* **10**, 80-92.
- Kastner, P., Mark, M., Ghyselinck, N., Krezel, W., Dupé, V., Grondona, J. M. and Chambon, P. (1997a). Genetic evidence that the retinoid signal is transduced by heterodimeric RXR/RAR functional units during mouse development. *Development* **124**, 313-326.
- Kastner, P., Messaddeq, N., Mark, M., Wendling, O., Grondona, J., Ward, S., Ghyselinck, N. and Chambon, P. (1997b). Vitamin A deficiency and mutations of RXR(alpha), RXR(beta) and RAR(alpha) lead to early differentiation of embryonic ventricular cardiomyocytes. *Development* **124**, 4749-4758.
- Kopf, E., Plassat, J. L., Vivat, V., de Thé, H., Chambon, P. and Rochette-Egly, C. (2000). Dimerization with retinoid X receptors and phosphorylation modulate the retinoic acid-induced degradation of retinoic acid receptors  $\alpha$  and  $\gamma$  through the ubiquitin-proteasome pathway. *J. Biol. Chem.* **275**, 33280-33288.
- Krezel, W., Dupé, V., Mark, M., Dierich, A., Kastner, P. and Chambon, P. (1996). RXR gamma null mice are apparently normal and compound RXR $\alpha$ <sup>+/+</sup>/RXR $\beta$ <sup>+/+</sup>/RXR $\gamma$ <sup>-/-</sup> mutant mice are viable. *Proc. Natl. Acad. Sci. USA* **93**, 9010-9014.
- Krezel, W., Ghyselinck, N., Samad, T. A., Dupé, V., Kastner, P., Borrelli, E. and Chambon, P. (1998). Impaired locomotion and dopamine signaling in retinoid receptor mutant mice. *Science* **279**, 863-867.
- Krezel, W., Kastner, P. and Chambon, P. (1999). Differential expression of retinoid receptors in the adult mouse central nervous system. *Neuroscience* **89**, 1291-1300.
- Lefebvre, O., Regnier, C., Chenard, M. P., Wendling, C., Chambon, P., Basset, P. and Rio, M. C. (1995). Developmental expression of mouse stromelysin-3 mRNA. *Development* **121**, 947-955.
- Leid, M., Kastner, P. and Chambon, P. (1992). Multiplicity generates diversity in the retinoic acid signalling pathways. *Trends Biochem. Sci.* **17**, 427-433.
- Liu, Q. and Linney, E. (1993). The mouse retinoid-X receptor-gamma gene: genomic organisation and evidence for functional isoforms. *Mol. Endocrinol.* **7**, 651-658.
- Lohnes, D., Kastner, P., Dierich, A., Mark, M., Le Meur, M. and Chambon, P. (1993). Function of retinoic acid receptor gamma in the mouse. *Cell* **73**, 643-658.
- Lu, H. C., Eichele, G. and Thaller, C. (1997). Ligand-bound RXR can mediate retinoid signal transduction during embryogenesis. *Development* **124**, 195-203.
- Ludwig, M. G., Basset, P. and Anglard, P. (2000) Multiple regulatory elements in the murine stromelysin-3 promoter. Evidence for direct control by CCAAT/enhancer-binding protein beta and thyroid and retinoid receptors. *J. Biol. Chem.* **275**, 39981-39990.
- Lufkin, T., Dierich, A., LeMeur, M., Mark, M. and Chambon, P. (1991). Disruption of the Hox-1.6 homeobox gene results in defects in a region corresponding to its rostral domain of expression. *Cell* **66**, 1105-1119.
- Lufkin, T., Mark, M., Hart, C. P., Dollé, P., Le Meur, M. and Chambon, P. (1992). Homeotic transformation of the occipital bones of the skull by ectopic expression of a homeobox gene. *Nature* **359**, 835-841.
- Lussier, M., Canoun, C., Ma, C., Sank, A. and Shuler, C. (1993). Interdigital soft tissue separation induced by retinoic acid in mouse limbs cultured *in vitro*. *Int. J. Dev. Biol.* **37**, 555-564.
- Mangelsdorf, D. J. and Evans, R. M. (1995). The RXR heterodimers and orphan receptors. *Cell* **83**, 841-850.
- Mangelsdorf, D. J., Thummel, C., Beato, M., Herrlich, P., Schutz, G., Umesono, K., Blumberg, B., Kastner, P., Mark, M. and Chambon, P. (1995). The nuclear receptor superfamily: the second decade. *Cell* **83**, 835-839.
- Mark, M., Ghyselinck, N. B., Wendling, O., Dupé, V., Mascrez, B., Kastner, P. and Chambon, P. (1999). A genetic dissection of the retinoid signalling pathway in the mouse. *Proc. Nutr. Soc.* **58**, 609-613.
- Mark, M., Lufkin, T., Vonesch, J. L., Ruberte, E., Olivo, J. C., Dollé, P., Gorry, P., Lumsden, A. and Chambon, P. (1993). Two rhombomeres are altered in Hoxa-1 mutant mice. *Development* **113**, 319-338.
- Mascrez, B., Mark, M., Dierich, A., Ghyselinck, N. B., Kastner, P. and Chambon, P. (1998). The RXRalpha ligand-dependent activation function 2 (AF-2) is important for mouse development. *Development* **125**, 4691-707.
- Mendelsohn, C., Ruberte, E., Le Meur, M., Morriss-Kay, G. and Chambon, P. (1991). Developmental analysis of the retinoic acid-inducible RAR-beta 2 promoter in transgenic animals. *Development* **113**, 723-734.
- Metzger, D., Clifford, J., Chiba, H. and Chambon, P. (1995). Conditional site-specific recombination in mammalian cells using a ligand-dependent chimeric Cre recombinase. *Proc. Natl. Acad. Sci. USA* **92**, 6991-6995.
- Minucci, S., Saint-Jeannet, J. P., Toyama, R., Scita, G., De Luca, L. M., Tiara, M., Levin, A. A., Ozato, K. and Dawid, I. B. (1996). Retinoid X receptor-selective ligands produce malformations in Xenopus embryos. *Proc. Natl. Acad. Sci. USA* **93**, 1803-1807.
- Minucci, S., Leid, M., Toyama, R., Saint-Jeannet, J. P., Peterson, V. J., Horn, V., Ishmael, J. E., Bhattacharyya, N., Dey, A., Dawid, I. B., et al. (1997). Retinoid X receptor (RXR) within the RXR-retinoic acid receptor heterodimer binds its ligand and enhances retinoid-dependent gene expression. *Mol. Cell. Biol.* **17**, 644-655.
- Moras, D. and Gronemeyer, H. (1998). The nuclear receptor ligand-binding domain: structure and function. *Curr. Opin. Cell. Biol.* **10**, 384-391.
- Nagata, T., Kanno, Y., Ozato, K. and Taketo, M. (1994). The mouse Rxrb gene encoding RXR beta: genomic organisation and two mRNA isoforms generated by alternative splicing of transcripts initiated from CpG island promoters. *Gene* **142**, 183-189.
- Nagpal, S., Zelent, A. and Chambon, P. (1992). Promoter context- and response element-dependent specificity of the transcriptional activation and modulating functions of retinoic acid receptors. *Cell* **70**, 1007-1019.
- Nagpal, S., Friant, S., Nakshatri, H. and Chambon, P. (1993). RARs and RXRs: evidence for two autonomous transactivation functions (AF-1 and AF-2) and heterodimerization *in vivo*. *EMBO J.* **12**, 2349-2360.
- Nagy, L., Thomazy, V. A., Shipley, G. L., Fesus, L., Lamph, W., Heyman, R. A., Chandraratna, R. A. and Davies, P. J. (1995). Activation of retinoid X receptors induces apoptosis in HL-60 cell lines. *Mol. Cell. Biol.* **15**, 3550-3551.
- Perlmann, T. and Evans, R. M. (1997). Nuclear receptors in Sicily: all in the famiglia. *Cell* **90**, 391-397.
- Perry, T. A., Torres, E. M., Czech, C., Beyreuther, K., Richards, S. and Dunnett, S. B. (1995). Cognitive and motor function in transgenic mice carrying excess copies of the 695 and 751 amino acid isoforms of the amyloid precursor protein gene. *Alzheimer's Res.* **1**, 5-14.
- Rochette-Egly, C., Lutz, Y., Pfister, V., Heyberger, S., Scheuer, I.,

- Chambon, P. and Gaub, M. P.** (1994). Detection of retinoid X receptors using specific monoclonal and polyclonal antibodies. *Biochem. Biophys. Res. Commun.* **204**, 525-536.
- Rochette-Egly, C., Adam, S., Rossignol, M., Egly, J. M. and Chambon, P.** (1997). Stimulation of RAR alpha activation function AF-1 through binding to the general transcription factor TFIID and phosphorylation by CDK7. *Cell* **90**, 97-107.
- Rochette-Egly, C. and Chambon, P.** (2001). F9 embryocarcinoma cells: a cell autonomous model to study the functional selectivity of RARs and RXRs in retinoid signaling. *Histol. Histopathol.* (in press).
- Roy, B., Taneja, R. and Chambon, P.** (1995). Synergistic activation of retinoic acid (RA)-responsive genes and induction of embryonal carcinoma cell differentiation by an RA receptor alpha (RAR alpha)-, RAR beta-, or RAR gamma-selective ligand in combination with a retinoid X receptor-specific ligand. *Mol. Cell. Biol.* **15**, 6481-6487.
- Sapin, V., Dollé, P., Hindelang, C., Kastner, P. and Chambon, P.** (1997). Defects of the chorioallantoic placenta in mouse RXR $\alpha$  null fetuses. *Dev. Biol.* **191**, 29-41.
- Shao, D., Rangwala, S. M., Bailey, S. T., Kralow, S. L., Reginato, M. J. and Lazar, M. A.** (1998). Interdomain communication regulating ligand binding by PPAR- $\gamma$ . *Nature* **396**, 377-380.
- Sporn, M. B., Roberts, A. B. and Goodman, D. S.** (1994). In *The Retinoids*. 2nd edn (ed. M. B. Sporn, A. B. Roberts and D. S. Goodman), pp. 319-350. New York: Raven Press.
- Sucov, H. M., Dyson, E., Gumeringer, C. L., Price, J., Chien, K. R. and Evans, R. M.** (1994). RXR alpha mutant mice establish a genetic basis for vitamin A signaling in heart morphogenesis. *Genes Dev.* **8**, 1007-1018.
- Taneja, R., Roy, B., Plassat, J. L., Zusi, C. F., Ostrowski, J., Reczek, P. R. and Chambon, P.** (1996). Cell-type and promoter-context dependent retinoic acid receptor (RAR) redundancies for RAR beta 2 and Hoxa-1 activation in F9 and P19 cells can be artefactually generated by gene knockouts. *Proc. Natl. Acad. Sci. USA* **93**, 6197-6202.
- Taneja, R., Rochette-Egly, C., Plassat, J. L., Penna, L., Gaub, M. P. and Chambon, P.** (1997). Phosphorylation of activation function AF-1 and AF-2 of RAR $\alpha$  and RAR $\gamma$  is indispensable for differentiation of F9 cells upon retinoic acid and cAMP treatment. *EMBO J.* **16**, 6452-6465.
- Thomas, J. H.** (1993). Thinking about genetic redundancy. *Trends Genet.* **9**, 395-398.
- Tremblay, A., Tremblay, G. B., Labrie, F. and Giguère, V.** (1999). Ligand-independent recruitment of SRC-1 to estrogen receptor  $\beta$  through phosphorylation of activation function AF-1. *Mol. Cell* **3**, 513-519.
- Vivat, V., Zechel, C., Wurtz, J. M., Bourguet, W., Kagechika, H., Umemiya, H., Shudo, K., Moras, D., Gronemeyer, H. and Chambon, P.** (1997). A mutation mimicking ligand-induced conformational change yields a constitutive RXR that senses allosteric effects in heterodimers. *EMBO J.* **16**, 5697-5709.
- Wendling, O., Chambon, P. and Mark, M.** (1999). Retinoid X receptors are essential for early mouse development and placentogenesis. *Proc. Natl. Acad. Sci. USA* **96**, 547-551.
- White, J. C., Shankar, V. N., Highland, M., Epstein, M. L., De Luca, H. F. and Clagett-Dame, M.** (1998). Defects in embryonic hindbrain development and fetal resorption resulting from vitamin A deficiency in the rat are prevented by feeding pharmacological levels of all-trans retinoic acid. *Proc. Natl. Acad. Sci. USA* **95**, 13459-13464.
- Wilson, J. G., Roth, C. B. and Warkany, J.** (1953). An analysis of the syndrome of malformations induced by maternal vitamin A deficiency. Effects of restoration of vitamin A at various times during gestation. *Am. J. Anat.* **92**, 189-217.
- Wolffgramm, J., Rommelspacher, H. and Buck, E.** (1990). Ethanol reduces tolerance, sensitization, and up-regulation of D2-receptors after subchronic haloperidol. *Pharmacol. Biochem. Behav.* **36**, 907-914.
- Wurtz, J. M., Bourguet, W., Renaud, J. P., Vivat, V., Chambon, P., Moras, D. and Gronemeyer, H.** (1996). A canonical structure for the ligand-binding domain of nuclear receptors. *Nat. Struct. Biol.* **3**, 87-94.
